# Supplementary material for: Cardiovascular disease risk factors induce mesenchymal features and senescence in mouse cardiac endothelial cells
Source: PubMed Central journal article supplement (PMC8043751; doi:10.7554/elife.62678), 2021-03-04
Supplement: elife-62678-fig1-data2.pdf [file elife-62678-fig1-data2.pdf]

**Figure 1- Figure supplement 4. Echocardiography measurements of cardiac function and ventricular dimensions.**

| Experiment groups                          | IVS,d (mm)             | IVS,s (mm)             | LVID,d (mm)            | LVID,s (mm)            | LVPW,d (mm)            | LVPW,s (mm)            | LV Vol,d (μl)         | LV Vol,s (μl)          | LV mass (mg)            | FS (%)                |
|--------------------------------------------|------------------------|------------------------|------------------------|------------------------|------------------------|------------------------|-----------------------|------------------------|-------------------------|-----------------------|
| <b>6 weeks of treadmill running</b>        |                        |                        |                        |                        |                        |                        |                       |                        |                         |                       |
| EXE (n=5); 3 mo old                        | 1.02±0.14              | 1.33±0.13              | 3.84±0.10              | 2.56±0.12 <sup>†</sup> | 0.74±0.05              | 1.25±0.05              | 63.8±4.01             | 23.9±2.73 <sup>†</sup> | 103.6±19.1              | 33.5±2.3              |
| SED (n=5); 3 mo old                        | 0.89±0.07              | 1.13±0.11              | 3.93±0.05              | 2.94±0.10              | 0.89±0.09              | 1.22±0.13              | 67.2±1.85             | 33.5±2.83              | 106.9±4.4               | 25.3±1.9              |
| <b>14 weeks of high fat diet feeding</b>   |                        |                        |                        |                        |                        |                        |                       |                        |                         |                       |
| HFD (n=5); 3 mo old                        | 1.11±0.04 <sup>†</sup> | 1.39±0.06              | 3.92±0.13              | 3.10±0.21              | 0.86±0.03 <sup>†</sup> | 1.09±0.08              | 67.2±5.32             | 39.3±6.5               | 121.7±5.2               | 21.1±3.3 <sup>†</sup> |
| CHOW (n=5); 3 mo old                       | 0.93±0.05              | 1.41±0.03              | 4.19±0.08              | 2.96±0.08              | 0.75±0.04              | 1.05±0.15              | 78.5±3.54             | 34.2±2.4               | 107.9±3.8               | 29.4±1.6              |
| <b>18 months of aging</b>                  |                        |                        |                        |                        |                        |                        |                       |                        |                         |                       |
| AGED (n=6); 18 mo old                      | 1.05±0.03 <sup>†</sup> | 1.39±0.06 <sup>†</sup> | 4.16±0.11              | 3.31±0.13 <sup>†</sup> | 1.09±0.06 <sup>†</sup> | 1.34±0.06 <sup>†</sup> | 77.2±4.4              | 44.9±4.1 <sup>†</sup>  | 150.1±9.1 <sup>†</sup>  | 20.7±1.6 <sup>†</sup> |
| YOUNG (n=6); 2 mo old                      | 0.85±0.04              | 1.19±0.06              | 3.94±0.10              | 2.84±0.13              | 0.77±0.06              | 1.13±0.03              | 68.1±4.4              | 31.0±3.3               | 93.8±3.9                | 27.9±1.7              |
| <b>Trans-aortic constriction: Week 0-6</b> |                        |                        |                        |                        |                        |                        |                       |                        |                         |                       |
| Sham(n=5);Week 0                           | 0.78±0.03              | 1.12±0.03              | 3.50±0.06              | 2.31±0.05              | 0.79±0.01              | 1.19±0.03              | 51.0±2.0              | 18.2±1.2               | 73.5±1.6                | 34.1±0.8              |
| TAC (n=10);Week 0                          | 0.77±0.03              | 1.10±0.04              | 3.67±0.12              | 2.57±0.13              | 0.81±0.02              | 1.20±0.03              | 58.1±5.0              | 24.8±3.6               | 80.1±3.1                | 30.4±1.3              |
| Sham(n=5);Week 1                           | 0.73±0.03              | 1.07±0.06              | 3.88±0.09              | 2.74±0.12              | 0.75±0.03              | 1.09±0.05              | 65.4±3.7              | 28.4±3.1               | 80.1±2.2                | 29.4±1.9              |
| TAC (n=10);Week 1                          | 0.87±0.04 <sup>†</sup> | 1.18±0.06              | 3.92±0.12              | 3.03±0.18              | 0.98±0.06 <sup>†</sup> | 1.25±0.07              | 67.6±5.1              | 37.8±5.0               | 111.6±7.1 <sup>†</sup>  | 23.2±2.3              |
| Sham(n=5);Week 2                           | 0.70±0.04              | 1.07±0.05              | 3.89±0.06              | 2.63±0.07              | 0.76±0.02              | 1.11±0.04              | 65.6±2.8              | 25.6±1.8               | 79.3±3.2                | 32.4±1.4              |
| TAC (n=10);Week 2                          | 0.87±0.04 <sup>†</sup> | 1.14±0.05              | 4.12±0.15              | 3.34±0.21 <sup>†</sup> | 1.02±0.03 <sup>†</sup> | 1.27±0.04 <sup>†</sup> | 76.9±7.3              | 48.0±7.4 <sup>†</sup>  | 124.4±6.2 <sup>†</sup>  | 19.5±2.6 <sup>†</sup> |
| TAC (n=5); Week 3                          | 0.97±0.04 <sup>†</sup> | 1.17±0.04              | 4.38±0.19 <sup>†</sup> | 3.77±0.16              | 1.08±0.06 <sup>†</sup> | 1.29±0.07              | 87.8±9.8              | 61.4±6.6 <sup>†</sup>  | 153.6±12.2 <sup>†</sup> | 13.8±0.9 <sup>†</sup> |
| TAC (n=5); Week 4                          | 0.92±0.05 <sup>†</sup> | 1.20±0.06              | 4.60±0.23 <sup>†</sup> | 4.04±0.24              | 1.25±0.10 <sup>†</sup> | 1.37±0.09              | 99.0±13 <sup>†</sup>  | 72.8±11 <sup>†</sup>   | 178.3±9.9               | 12.4±0.8 <sup>†</sup> |
| TAC (n=5); Week 5                          | 0.89±0.10 <sup>†</sup> | 1.15±0.11              | 4.92±0.07 <sup>†</sup> | 4.40±0.09              | 1.00±0.05 <sup>†</sup> | 1.12±0.03 <sup>†</sup> | 114.0±4 <sup>†</sup>  | 87.8±4.3 <sup>†</sup>  | 165.6±10                | 10.6±1.4 <sup>†</sup> |
| TAC (n=5); Week 6                          | 0.81±0.06              | 0.96±0.08              | 5.15±0.22 <sup>†</sup> | 4.82±0.24              | 0.98±0.09 <sup>†</sup> | 1.01±0.09              | 127.8±13 <sup>†</sup> | 110.2±13 <sup>†</sup>  | 164.9±7.9               | 6.4±0.8 <sup>†</sup>  |

**mo:** Months; **IVS,d:** Interventricular septum thickness at end-diastole; **IVS,s:** Interventricular septum thickness at end-systole; **LVID,d:** Left ventricular internal dimension at end-diastole; **LVID,s:** Left ventricular internal dimension at end-systole; **LVPW,d:** Left ventricular posterior wall thickness at end-diastole; **LVPW,s:** Left ventricular posterior wall thickness at end-systole; **LV Vol, d:** Left ventricular volume at end-diastole; **LV Vol,s:** Left ventricular volume at end-systole; **LV mass:** Left ventricular mass; **FS:** Fractional shortening.

Data are mean±SEM. Student *t* test was used, † p<0.05.
