# Supplementary material for: Cardiovascular disease risk factors induce mesenchymal features and senescence in mouse cardiac endothelial cells
Source: eLife. 2021 Mar 4;10:e62678. doi: 10.7554/eLife.62678 (PMC8043751; doi:10.7554/eLife.62678)
Supplement: Figure 1—figure supplement 1—source data 1. [file elife-62678-fig1-figsupp1-data1.xlsx]

## Sheet: Figure S1C-F
Analysis of Ejection fraction (EF, %) in the indicated experimental groups
Figure S1C	SED (EF, %)	EXE (EF, %)		Figure S1D	CHOW (EF, %)	HFD (EF, %)		Figure S1E	YOUNG (EF, %)	AGED (EF, %)		Figure S1F	SHAM (Week 0, EF %)	TAC (Week 0, EF %)	SHAM (Week 1, EF %)	TAC (Week 1, EF %)	SHAM (Week 2, EF %)	TAC (Week 2, EF %)	TAC (Week 3, EF %)	TAC (Week 4, EF %)	TAC (Week 5, EF %)	TAC (Week 6, EF %)
	47.955	70.568			63.2	50.304			45.598	55.28			62.4	59.7	59.9	43.1	67.7	25.4	24.9	25.3	27.1	19.1
	49.255	68.991			60.138	38.988			61.473	43.901			68.2	66.3	55.4	68.4	55.9	70.7	34.8	31.3	31.5	13.6
	41.205	59.705			54.176	55.851			52.23	38.354			63.1	63.8	52.6	46.4	58.9	43.2	30.1	29.2	21.1	17.3
	52.646	60.795			55.541	26.783			63.219	40.101			62.6	59.2	49.4	41.9	62.1	49.1	30.4	22.1	18.2	9.9
	60.866				52.059	36.778			54.749	35.965			64	45.1	66.6	49.3	61.2	40.2	27.8	26.3	16.3	11.1
Mean	50.3854	65.0148		Mean	57.0228	41.7408			49.745	40.421				54.5		30		37.8
								Mean	54.5023	42.337				55		44.4		36.7
														63.6		52.8		42.7
														53.2		29		20.2
														63.9		59.2		30.3
												Mean	64.06	58.43	56.78	46.45	61.16	39.63	29.6	26.84	22.84	14.2

## Sheet: Figure S1G-I
Analysis of Body weight, Blood glucose levels and Total body fat in the CHOW and HFD fed mice
Figure S1G		Mean Body weight (g)			Figure S1H		Mean Blood Glucose (mmol/L)			Figure S1I	Total Body Fat (%)
	Diet (Week)	CHOW	HFD			Time	CHOW	HFD			CHOW	HFD
	0	22	23			0	9.3	14.3			12.5	46.8
	2	25	30			15	17.7	23.7			17	47.2
	4	26	34			30	16	22.6			14.8	52.2
	6	26	39			60	10.3	18.3			13.2	35.4
	8	27	41			90	8.7	19.1			10.8	37.3
	10	28	43							Mean	13.66	43.78
	12	28	46
	14	27	47
