# Supplementary material for: Cardiovascular disease risk factors induce mesenchymal features and senescence in mouse cardiac endothelial cells
Source: eLife. 2021 Mar 4;10:e62678. doi: 10.7554/eLife.62678 (PMC8043751; doi:10.7554/eLife.62678)
Supplement: Figure 1—figure supplement 2—source data 1. [file elife-62678-fig1-figsupp2-data1.xlsx]

## Sheet: Figure S2A
FACS analysis of Cardiac EC (CD31 %) in the SED and EXE mice
	SED (CD31, %)	EXE (CD31, %)
	12.1	13.1
	7.9	11.2
	10.5	14.3
	9.4	10.8
	7.52
Mean	9.484	12.35

## Sheet: Figure S2B
FACS analysis of Cardiac EC (CD31 %) in the YOUNG and AGED mice
	YOUNG (CD31, %)	AGED (CD31, %)
	48.5	21
	41	27.3
	35.6	36.7
	33.8	22.6
	49.1
Mean	41.6	26.9

## Sheet: Figure S2C
FACS analysis of Cardiac EC (CD31 %) in the CHOW and HFD mice
	CHOW (CD31, %)	HFD (CD31, %)
	26.7	23
	27.5	22.1
	31.6	21.9
	33.5	27
	27.4	25.1
Mean	29.34	23.82

## Sheet: Figure S2D
FACS analysis of Cardiac EC (CD31 %) in the Sham and TAC (2 and 7 WKS)
	Sham (CD31, %)	TAC 2 WKS (CD31, %)	TAC 7 WKS (CD31, %)
	23.9	20.3	15.9
	25.1	18.5	17.3
	21.5		17.4
	25.6		17.1
	25.8		16.6
			14.2
Mean	24.38	19.4	16.4167
