# Supplementary material for: Cardiovascular disease risk factors induce mesenchymal features and senescence in mouse cardiac endothelial cells
Source: eLife. 2021 Mar 4;10:e62678. doi: 10.7554/eLife.62678 (PMC8043751; doi:10.7554/eLife.62678)
Supplement: Figure 1—figure supplement 3—source data 1. [file elife-62678-fig1-figsupp3-data1.xlsx]

## Sheet: Figure S3B
Purity analysis of post sort cardiac EC fraction by QPCR and the data presented as Fold change (Ctrl = 1).
Cdh5	Whole heart	EC	Other Mononuclear cells		Tie 1	Whole heart	EC	Other Mononuclear cells
	1.23852	11.3957	0.0237976			1.40936	4.78182	0.0882624
	0.820041	9.44098	0.105062			1.25801	4.01725	0.118755
	0.984601	13.0096	0.0236523			0.780985	6.01913	0.0334617
		6.34662	0.0480659			0.722189	3.51532	0.046846
Mean	1.01439	10.0482	0.0501445		Mean	1.04264	4.58338	0.0718312
