# Supplementary material for: Cardiovascular disease risk factors induce mesenchymal features and senescence in mouse cardiac endothelial cells
Source: eLife. 2021 Mar 4;10:e62678. doi: 10.7554/eLife.62678 (PMC8043751; doi:10.7554/eLife.62678)
Supplement: Figure 1—source data 1. [file elife-62678-fig1-data1.xlsx]

## Sheet: Figure 1B
CD31+ Mean Fluroscence intensity (MFI)
	SED	EXE		YOUNG	AGED		CHOW	HFD		SHAM	TAC (2WKS)	TAC (7WKS)
	2495	3535		9632	4809		7547	5885		6628	5605	4937
	2174	2560		6999	5531		8751	5385		7925	4023	4643
	2206	2946		9610	8527		11595	5822		6396		4600
	2751	2580		7083	5100		11719	8877		7208		4189
	2069			8034			10302	6134		7475		4953
Mean	2339	2905.25		8271.6	5991.75		9982.8	6420.6				3932
										7126.4	4814	4542.33

## Sheet: Figure 1D
CD31+ Vessel area (%)
	SED	EXE		YOUNG	AGED		CHOW	HFD
	7.82502	11.746		8.279	7.863		8.625	7.91
	7.56785	11.072		9.047	6.211		9.211	8.199
	6.38041	11.548		9.196	6.768		9.498	8.642
		12.518		9.138			9.293	7.96
Mean	7.25776	11.4553		8.84067	6.94733		9.15675	8.17775
