# Supplementary material for: Cardiovascular disease risk factors induce mesenchymal features and senescence in mouse cardiac endothelial cells
Source: eLife. 2021 Mar 4;10:e62678. doi: 10.7554/eLife.62678 (PMC8043751; doi:10.7554/eLife.62678)
Supplement: Figure 2—source data 1. [file elife-62678-fig2-data1.xlsx]

## Sheet: Figure 2F
Z score of Top 50 differentially expressed genes in the cardiac EC of Sedentary and Exercise groups
Gene	Sed 1	Sed 2	Sed 3	Exe 1	Exe 2	Exe 3
Ankrd12	-1.03516	-1.2635	0.190422	1.42272	0.478097	0.20743
Ppl	-0.386992	-1.35828	-0.792382	0.978334	1.09947	0.459855
Ciart	-0.693165	-1.16799	-0.330074	1.69147	0.423716	0.0760474
Spock2	-0.345828	-1.09465	-0.957155	0.118074	1.41713	0.86243
Gm37788	-0.528868	-1.45255	-0.498136	0.963635	1.13523	0.380691
Adgrg6	-0.0284703	-1.67685	-0.606665	0.906937	0.632823	0.772223
D930016D06Rik	-1.11878	-0.783832	-0.351982	1.2973	-0.180471	1.13776
AC140299.1	-0.830862	-1.27047	-0.45643	0.559296	0.701317	1.29715
Upf3b	-0.853741	-1.49792	0.136914	1.20225	0.347126	0.665372
Mgp	-0.387629	-1.5028	-0.0436413	1.43488	-0.200932	0.700126
Spaca6	-0.815917	-1.46216	-0.218274	1.03048	0.654098	0.811781
Srek1	-1.28642	-1.04785	-0.0671705	1.20857	0.40867	0.784196
Ppp4r1l-ps	-0.838184	-0.557472	-0.993382	1.55527	0.075253	0.758519
Clk1	-0.693785	-1.55922	-0.136488	1.1222	0.576639	0.690655
Rbm25	-1.23999	-1.32697	0.633903	0.753105	0.454961	0.724985
Prpf38b	-1.00393	-1.48402	0.517767	0.787152	0.273442	0.909589
Pnisr	-1.21073	-0.733642	-0.711941	0.710977	0.75888	1.18645
Clasrp	-0.541238	-1.19348	-0.861337	1.26052	0.494529	0.84101
Zkscan3	-0.66538	-0.981008	-0.698292	1.06986	-0.12091	1.39573
Rbm5	-1.11003	-1.25861	0.298264	1.13946	0.0393661	0.891553
Nktr	-0.953338	-1.2837	0.126195	1.31717	-0.0375976	0.831268
Tra2a	-0.890872	-1.38253	0.342176	1.17532	-0.127423	0.883325
Safb2	-0.461087	-1.50427	-0.379127	0.911362	0.205024	1.2281
Zc3h7a	-0.839148	-0.684982	-1.10767	1.26942	0.507641	0.854737
Cep295	-1.02963	-0.738761	-0.846953	1.34121	0.819019	0.455106
Snora73b	0.58766	0.284429	1.58127	-1.02859	-0.725925	-0.698847
Scarna6	0.609135	0.523035	1.36508	-1.31449	-0.771084	-0.411685
Snord15a	0.43475	-0.0556483	1.7602	-0.710405	-1.01781	-0.411086
Hist1h1b	0.204653	1.13292	1.13819	-0.766635	-0.447849	-1.26128
Rn7sk	0.592476	0.558193	1.33199	-1.06771	-1.16689	-0.248059
Gm22442	0.602689	0.182468	1.47576	-0.44615	-1.44584	-0.36892
Ccdc107	0.108532	0.232687	1.75702	-0.198463	-0.911075	-0.988698
CT010467.1	0.874974	0.363363	1.15365	-0.241501	-1.52294	-0.627548
Snord17	0.418528	0.403231	1.60977	-0.877227	-0.993305	-0.560992
Scarna13	0.654855	0.319833	1.35867	-0.451101	-1.51032	-0.371935
Adamts4	0.956371	0.950966	0.494761	-1.53357	-0.756144	-0.112379
Hist1h2bn	0.274305	1.28209	1.02151	-0.764418	-0.840306	-0.973179
Camk2a	0.655722	0.190296	1.45538	-0.261504	-1.38514	-0.654745
Fhl3	0.373465	1.10547	1.00456	-0.736231	-1.40316	-0.344106
Col15a1	0.328417	0.676779	1.32927	-0.198922	-1.48449	-0.651052
Rpph1	0.57797	0.597987	1.27316	-1.07472	-1.22938	-0.145021
Hist1h3b	0.465666	0.756473	1.29695	-0.315821	-1.07076	-1.1325
Gm24245	0.571444	0.741248	1.10296	-0.088818	-1.47368	-0.853155
Apln	0.0343034	0.956077	1.30141	-0.11659	-1.01099	-1.16421
Rmrp	0.655849	0.217351	1.53456	-1.03419	-0.965051	-0.408519
Cdk1	0.273572	1.10612	1.13852	-0.989119	-0.405396	-1.1237
Gm26448	0.700323	0.544956	1.31055	-1.31166	-0.604748	-0.639421
Gm23935	0.661062	0.344288	1.32744	-0.0876842	-1.40042	-0.84469
Bcl3	0.493006	1.14436	1.0072	-0.664563	-1.11466	-0.865347
Hdc	0.143537	1.04372	1.24798	-0.908289	-1.1769	-0.35004

## Sheet: Figure 2G
Z score of Top 50 differentially expressed genes in the cardiac EC of Young and Aged groups
Gene	Young 1	Young 2	Young 3	Young 4	Aged 1	Aged 2	Aged 3
Spock2	-0.685165	-0.90646	-0.761441	-0.766424	0.602571	1.1838	1.33312
Robo2	-0.801523	-0.930786	-0.903907	-0.457824	0.683494	1.41977	0.990772
Pth1r	-0.761023	-0.593624	-0.704341	-1.07654	0.762417	1.27688	1.09623
Slit3	-0.32656	-1.00384	-0.905589	-0.846498	0.750559	1.34861	0.983324
Adam22	-0.574966	-0.776322	-0.908512	-0.78588	0.488429	1.51884	1.03841
Acer2	-0.78634	-0.871046	-0.456596	-0.874351	0.356653	1.48892	1.14276
Ifi207	-0.646105	-0.606596	-0.861139	-0.996254	0.63195	1.16645	1.3117
L1cam	-0.916536	-0.813749	-0.736675	-0.705783	0.797452	1.18453	1.19077
Lpl	-0.871003	-0.838294	-0.36464	-0.884536	0.306381	1.40538	1.24672
Hhipl1	-1.21922	-0.876944	-0.520514	-0.379614	0.527989	1.28106	1.18724
Agmo	-0.729464	-0.707676	-0.862192	-0.755226	0.568674	1.58945	0.896433
Myrip	-0.906256	-0.938152	-0.643642	-0.556785	0.453218	1.36874	1.22288
Prkcz	-0.790177	-0.600379	-0.886031	-0.886031	0.797618	1.26077	1.10423
Sdk2	-0.321391	-0.824625	-0.81276	-1.07152	0.529731	1.22871	1.27185
Ttll7	-0.952412	-0.935775	-0.308138	-0.827472	0.538266	1.4144	1.07113
Lipa	-0.743344	-0.90469	-0.590048	-0.620216	0.101112	1.58462	1.17257
Cpm	-0.890828	-1.07116	-0.473261	-0.469695	0.265422	1.49361	1.14591
Smad6	-0.656969	-0.761921	-0.805305	-0.647329	0.435105	1.83584	0.60058
Gpr160	-0.75409	-0.641846	-0.357035	-1.30334	0.790046	1.15625	1.11002
Pmp22	-1.16043	-0.850352	-0.517592	-0.439904	0.418805	1.12708	1.42239
Fam160a1	-0.711231	-0.889623	-0.976736	-0.51134	0.73827	0.875834	1.47483
Rassf4	-0.596831	-0.77787	-0.736908	-0.930124	0.411194	1.28701	1.34353
Fgfr3	-0.796234	-1.13944	-0.356904	-0.644956	0.322434	1.3301	1.28499
Anxa2	-0.787836	-0.945615	-0.475064	-0.682234	0.185883	1.57748	1.12738
Ism1	-0.967785	-0.967785	-0.411188	-0.579363	0.399818	1.63132	0.894986
Samd5	0.859793	0.685419	0.780238	0.74823	-1.58407	-0.702429	-0.787182
Lcp1	0.820126	0.403044	0.80397	0.962088	-1.47686	-0.389971	-1.12239
Peg3	0.625128	0.691044	0.620227	0.974581	-1.54103	-0.193025	-1.17693
Asxl3	0.894225	0.542359	0.708133	1.00192	-1.28979	-0.846547	-1.0103
Has3	0.807859	0.61054	0.80527	0.958671	-1.10255	-1.15972	-0.920075
Armcx4	0.991621	1.01322	0.203261	0.863407	-1.07577	-0.832804	-1.16294
Stxbp6	0.72251	0.489463	0.614413	0.97661	-1.85039	-0.354935	-0.597671
Ppp1r9a	0.785797	0.760523	0.694178	0.869236	-0.566153	-1.19682	-1.34676
Adam19	1.04408	0.207584	0.590108	1.15061	-0.832034	-0.7896	-1.37074
Sntb1	0.782617	0.46053	0.621443	1.20634	-1.08057	-0.690586	-1.29977
Carmn	0.905192	0.743686	0.576566	0.690573	-1.77548	-0.482257	-0.658277
Arl4c	0.754923	0.411124	0.61782	1.16135	-1.25415	-0.331784	-1.35928
Rftn2	0.815841	0.666305	0.425637	0.956374	-1.56385	-0.148356	-1.15196
Plekhh2	0.690103	0.183116	0.736005	0.955402	-1.58748	0.231923	-1.20907
Casq2	0.472455	0.764451	0.699322	0.71636	-1.98901	-0.248545	-0.415035
Tanc2	0.444136	0.442763	0.66053	1.04338	-1.78275	0.133127	-0.941185
Ptk7	0.801822	0.781013	0.770503	0.801822	-1.30212	-0.705032	-1.14801
Rgs7bp	0.689731	0.450607	1.041	0.746243	-1.71692	-0.605331	-0.605331
Cd247	1.129	0.806211	0.212024	0.76255	-1.56275	-0.450479	-0.896562
Syt15	1.13417	0.602806	0.197972	1.08936	-0.944321	-0.853673	-1.22632
Trerf1	0.790735	0.551222	0.790735	0.682094	-0.84125	-0.17275	-1.80079
Pcdh17	1.07027	0.197672	0.210487	1.23811	-1.00318	-0.238594	-1.47476
Nos2	0.859358	0.041945	0.338001	1.03644	-1.88938	0.268821	-0.655183
Ccdc125	0.939985	0.629674	0.629674	0.737846	-1.14998	-0.238028	-1.54917
Lurap1l	0.846928	0.734031	0.46886	0.981387	-0.911796	-0.567952	-1.55146

## Sheet: Figure 2H
Z score of Top 50 differentially expressed genes in the cardiac EC of Chow and HFD groups
Gene	CHOW 1	CHOW 2	CHOW 3	HFD 1	HFD 2	HFD 3
Hist1h1b	-1.20032	-1.00568	-0.43169	1.02696	0.736013	0.874715
Hist1h2af	-1.13112	-1.05408	-0.300524	1.19638	0.286453	1.00289
Hist1h2an	-0.639232	-0.601797	-1.34226	1.0921	0.993655	0.49753
Spc25	-1.01215	-0.781467	-0.73184	0.888312	0.226933	1.41021
Top2a	-0.78148	-0.984311	-0.328107	0.704225	-0.267255	1.65693
Hist1h2ai	-1.1319	-1.1319	-0.358803	0.881474	0.9602	0.780937
Kntc1	-1.12499	-0.8335	-0.662154	0.529999	0.785563	1.30508
Ccna2	-0.798428	-1.32218	-0.174747	0.959025	0.0471957	1.28913
Hist1h2bb	-0.605631	-1.27608	-0.503029	1.37676	0.0866641	0.921318
Kif14	-0.779339	-1.10626	-0.694388	1.37989	0.42337	0.776731
Pimreg	-0.574452	-1.21728	-0.497258	1.09386	-0.120171	1.3153
Pclaf	-0.961758	-1.34523	-0.194813	0.748311	0.621708	1.13178
Nek2	-0.953893	-1.25667	-0.238564	0.759664	0.370543	1.31892
Fanci	-0.983934	-0.983934	-0.731959	0.653307	0.963901	1.08262
Melk	-1.37287	-0.145115	-0.886353	0.893427	0.325975	1.18494
Hist1h2bm	-0.443523	-1.35371	-0.405105	1.35432	-0.129573	0.977589
Kif11	-0.61985	-0.969754	-0.636861	0.705067	-0.138001	1.6594
Cdk1	-0.490349	-1.24392	-0.589251	1.25465	-0.0654111	1.13428
Hist1h2bj	-1.17435	-0.926457	-0.552667	1.02636	0.61359	1.01352
Hist1h2bn	-0.724725	-1.48931	0.0758442	1.09273	0.017543	1.02791
Diaph3	-0.760078	-1.4404	-0.0505507	0.969898	0.100361	1.18077
Sgo2a	-0.343939	-1.03202	-0.879765	0.402792	0.163662	1.68927
Arl4aos	-1.20338	-0.806404	-0.574186	1.15099	1.04845	0.384532
Nuf2	-0.627369	-0.697	-0.771128	0.438492	-0.161662	1.81867
Hist1h3g	0.523977	-1.26984	-1.26984	0.975139	0.456475	0.584099
Has3	0.719902	1.27425	0.451444	-0.917159	-1.33211	-0.196331
Gm43923	0.645715	0.754953	0.858686	-1.26533	-1.26533	0.271315
Gp5	0.687411	0.525368	1.34615	-0.914807	-1.17624	-0.46788
Gm9522	0.771945	1.05861	0.788127	-1.12338	-1.12338	-0.371923
Zc3h6	0.101503	0.929009	1.3087	-1.16044	-1.02099	-0.157775
AC124687.2	1.03332	0.827839	0.585572	-1.05493	-1.33723	-0.0545782
Aldh1l1	0.7732	0.943843	0.816241	-0.78223	-1.46718	-0.283878
Themis2	0.433109	0.932628	0.839295	-0.797885	-1.60122	0.194078
Nuak1	0.363307	1.03381	1.06431	-1.13594	-1.16157	-0.163924
Cirbp	0.104841	0.682054	1.46887	-1.02223	-1.14614	-0.0874023
Kcnb1	0.93635	0.737108	0.394027	-0.789101	-1.6354	0.357015
Alpl	0.709952	0.71304	0.692185	-0.655281	-1.73329	0.273392
Il20rb	0.460031	0.726096	1.17038	-1.00658	-1.37031	0.0203794
Egr1	0.113798	1.51597	0.651483	-1.04153	-1.07329	-0.166429
Dhcr24	0.639901	0.491761	1.10487	-0.585651	-1.66873	0.017843
Map6	0.771123	0.645168	0.88103	-1.15234	-1.35656	0.211582
Ldlr	0.195038	0.779867	1.31959	-0.518876	-1.50701	-0.268613
Igfbp3	1.00436	0.551003	0.748823	-0.915469	-1.50817	0.119449
Gm44220	0.748874	0.561235	0.855761	-0.654702	-1.7099	0.19873
Pdgfrb	0.695941	0.549905	0.916563	-0.99759	-1.50425	0.339436
Ace	0.770366	0.664597	0.679987	-0.702081	-1.70929	0.296423
Tln2	0.931123	0.550844	0.604945	-0.972137	-1.53135	0.416577
Eef2k	0.824903	0.613449	0.757769	-1.2041	-1.34073	0.348707
Exoc3l2	0.627926	0.917236	0.730084	-0.912873	-1.53851	0.176134
Pitpnm3	1.02595	0.724989	0.531885	-0.624536	-1.65797	-0.0003098

## Sheet: Figure 2I
Z score of Top 50 differentially expressed genes in the cardiac EC of Sham and TAC (2WKS) groups
Gene	Sham 1	Sham 2	Sham 3	Sham 4	TAC (2 WKS) 1	TAC (2 WKS) 2	TAC (2 WKS) 3	TAC (2 WKS) 4
Lrg1	-0.979034	-0.886658	-0.858418	-0.780019	1.08175	1.52956	0.417044	0.475777
Col15a1	-0.969981	-0.812692	-1.15938	-0.704642	1.06708	1.22583	0.689129	0.664666
Sema3d	-1.14824	-0.3464	-1.13254	-0.874537	1.16902	1.24086	0.469418	0.62242
Dbn1	-0.802948	-0.877725	-1.06183	-0.919082	0.682468	1.0676	0.655594	1.25592
Adamts4	-1.05782	-0.418961	-0.560575	-1.43209	0.583783	0.579511	1.20067	1.10549
Mmp14	-1.0696	-0.687364	-1.05658	-0.890419	0.85332	1.03702	0.792633	1.021
Cmah	-0.906354	-0.65774	-0.965977	-0.965977	1.24109	1.39465	0.320014	0.540292
Synpo	-0.819871	-0.974693	-0.757974	-1.02432	1.287	1.05819	0.284637	0.947034
Fam167b	-0.815606	-0.520875	-1.24775	-1.05342	0.931643	1.1357	0.840889	0.72941
Igf1	-1.51643	-0.381716	-0.9544	-0.578406	1.15142	0.819209	1.08099	0.379339
C1qtnf6	-1.178	-0.245021	-0.538789	-1.4391	0.720327	1.29562	0.561314	0.823649
Emp1	-0.853733	-1.01825	-0.650378	-1.17254	0.997843	0.808307	0.901202	0.987548
Upp1	-1.19299	-0.546724	-0.774341	-1.04677	1.02462	1.35407	0.575855	0.606281
Tnc	-1.01723	-0.623231	-1.47118	-0.411221	1.13657	0.70858	0.693776	0.983943
Cysltr1	-1.69187	-0.622515	-0.323763	-0.745943	0.529197	1.11131	0.707911	1.03567
Inhbb	-1.20486	-0.870232	-0.407966	-0.988287	0.565299	1.54135	0.78567	0.579028
Marcksl1	-1.09206	-0.452421	-1.26299	-0.750342	1.26533	0.852888	0.519957	0.919633
Tnfaip2	-1.21552	-0.642817	-0.472043	-1.25387	1.0335	0.99663	0.626672	0.927456
Pi16	-0.670286	-1.18013	-0.618147	-1.03252	0.903209	0.687774	0.408818	1.50128
Tubb6	-1.00615	-0.304166	-1.06643	-1.17441	1.21671	1.00921	0.691006	0.634229
Ctnnal1	-0.808176	-0.989609	-0.846665	-0.789292	1.05781	1.61554	0.449741	0.310653
Reln	-0.709869	-0.189817	-1.00264	-1.13525	1.01815	1.71937	-0.103037	0.403101
Tmem252	-0.369181	-0.953028	-1.0333	-1.21426	0.907551	0.934975	1.19814	0.529103
Tll1	-0.977635	-0.693052	-1.12716	-0.669656	1.08553	1.50139	0.551449	0.329137
Exoc3l4	-1.11018	-0.498794	-0.862768	-0.981012	1.05677	0.0874879	1.26134	1.04716
9530026P05Rik	1.00373	1.05802	1.05092	0.413053	-0.470083	-1.43038	-0.884671	-0.740582
Tnnt2	0.701565	1.41191	0.656657	0.644513	-0.718121	-1.59561	-0.555432	-0.54548
Tnni3	1.00903	1.04902	0.705679	0.701911	-0.848757	-1.42046	-0.130802	-1.06562
Myl2	0.732764	1.21166	0.91848	0.471338	-0.847814	-1.69877	-0.309101	-0.47856
Alpl	0.917071	1.45967	0.350764	0.75829	-1.24492	-1.00073	-0.690909	-0.549238
Cep170b	1.18975	0.937197	0.944462	0.571766	-0.58909	-1.15631	-0.983336	-0.914442
Slc4a3	0.644047	1.2484	0.901442	0.644047	-1.3182	-1.3182	-0.363384	-0.438155
Abcb4	1.04758	0.793265	1.04758	0.819462	-1.00466	-1.09973	-0.80175	-0.80175
Ckmt2	0.642135	0.963555	0.879616	0.819498	-0.367028	-1.86864	-0.44551	-0.623622
Eno3	0.099163	1.30623	1.24476	0.714496	-1.02758	-1.12599	-0.316695	-0.894385
Sncg	0.827348	1.49364	0.730206	0.247505	-0.513423	-0.887193	-0.384227	-1.51385
Eef1a2	0.582547	1.31408	1.15784	0.321187	-1.34215	-1.01426	-0.244517	-0.774728
Rgs10	0.906262	1.13393	0.537595	1.02435	-1.25435	-0.976755	-0.476596	-0.894436
Casq2	0.714414	1.3091	0.440277	0.739381	-0.795835	-1.55588	0.13049	-0.981946
2810454H06Rik	0.685409	1.22663	0.812202	0.845716	-0.832794	-1.12683	-0.363109	-1.24722
Coro6	1.12342	0.72922	1.00196	0.794059	-0.838661	-1.33254	-0.713457	-0.764002
Cbx7	0.947007	1.06181	0.895013	0.590369	-0.800592	-0.213377	-1.06138	-1.41886
Lmod1	0.885978	1.43534	0.379656	0.427098	-1.38094	-1.33832	-0.0517343	-0.357075
Ldhb	0.783119	1.41716	0.478024	0.840647	-0.970838	-1.14164	-0.38057	-1.0259
Mb	0.958615	0.969352	0.67863	0.527626	-0.898048	-1.87017	-0.0575632	-0.308439
Gstt2	0.681137	0.619315	0.521817	1.53544	-0.853813	-0.149658	-1.17712	-1.17712
Pth1r	0.759257	1.0986	0.692552	0.594275	-0.0702239	-0.363549	-1.89034	-0.820563
Gm44220	0.650216	0.857387	0.795582	0.835415	-0.964117	-1.88097	-0.129629	-0.163882
Actn2	0.586201	1.23987	0.811405	0.553926	-0.827545	-1.79237	-0.0699178	-0.50156
Gm43923	1.09041	1.46151	0.255738	0.544727	-0.693017	-0.886457	-0.399028	-1.37389

## Sheet: Figure 2J
Z score of Top 50 differentially expressed genes in the cardiac EC of Sham and TAC (7WKS) groups
Gene	Sham 1	Sham 2	Sham 3	Sham 4	TAC (7 WKS) 1	TAC (7 WKS) 2	TAC (7 WKS) 3	TAC (7 WKS) 4
Stc1	-0.807351	-0.876425	-1.29368	-0.396516	0.697412	1.40601	0.145977	1.12457
Exoc3l4	-1.1525	-0.575333	-0.91893	-1.03055	0.760072	1.08626	0.902154	0.928824
Pi16	-0.727413	-1.18733	-0.680381	-1.05417	0.801434	0.983761	1.19608	0.668015
Myh7	-0.809145	-0.186578	-1.352	-0.929871	0.343541	0.977211	0.417017	1.53982
Acta1	-1.41996	-0.934377	0.0170291	-1.05468	1.04928	0.594593	0.962169	0.785945
Gm39822	-0.844504	-1.16404	-0.596648	-0.79031	0.514798	1.05909	0.237983	1.58364
Ankrd1	-1.66349	-0.167057	-0.861526	-0.597221	0.580086	0.908956	0.49834	1.30191
Fam167b	-0.733378	-0.408794	-1.20929	-0.995276	0.772528	0.310826	0.589833	1.67355
Lrp3	-0.819766	-1.16027	-0.633064	-0.692445	0.2335	0.815022	0.482106	1.77491
Ackr2	-0.862888	-1.094	-0.152112	-1.3337	0.476147	1.15276	0.739257	1.07454
Inhbb	-1.04077	-0.859722	-0.609615	-0.923595	0.245256	1.059	0.562671	1.56677
Arc	-0.564473	-0.996687	-0.287181	-1.48919	0.565964	1.29981	0.351848	1.11991
Adamts4	-0.984254	-0.196429	-0.371063	-1.44579	0.0957258	1.01359	0.256563	1.63166
Ednrb	-0.790208	-0.66795	-0.817658	-1.09431	0.0387482	1.43576	0.628632	1.26699
Col15a1	-0.942113	-0.677226	-1.26108	-0.495262	0.845462	0.955367	0.0980149	1.47684
Cd74	-1.48792	-0.488571	-0.488571	-0.888617	0.347867	1.05389	0.538712	1.41321
Cysltr1	-1.49209	-0.639015	-0.400684	-0.73748	0.549123	0.911492	0.236153	1.5725
Adamtsl2	-0.617327	-0.947665	-0.0665577	-1.67615	0.477951	0.86901	0.957028	1.00371
Sema3f	-0.754359	-1.01533	-0.500242	-1.01209	0.0859428	1.19307	0.414701	1.58831
Foxf1	-0.868603	-0.754044	0.0261469	-1.68505	0.595016	0.817403	0.750406	1.11873
Slco2a1	-0.87476	-0.508984	-0.758405	-1.02105	0.54572	0.636304	0.0705928	1.91058
Dbn1	-0.575886	-0.673132	-0.912562	-0.726917	-0.391393	1.23329	0.286552	1.76005
Ttc9	-0.606814	-0.398447	-0.256588	-1.76891	0.329132	1.57677	0.722018	0.402844
Uchl1	-0.468418	-1.35473	-0.807452	-0.901864	0.809417	1.04476	0.436068	1.24222
Adam12	-0.868726	-0.783362	-0.578232	-0.587445	1.42086	1.17916	0.98043	-0.762692
Myh6	0.847271	1.33607	0.725678	0.609807	-0.374265	-1.22549	-0.719473	-1.1996
Pln	0.632746	1.36671	0.580526	0.903215	-0.271485	-1.28097	-0.950096	-0.980647
Myl2	0.774777	1.21696	0.946256	0.533393	-0.260089	-1.43982	-0.765281	-1.00619
Tnni3	1.00976	1.04747	0.723734	0.720181	-0.352496	-1.39522	-0.535699	-1.21774
Chchd10	1.0315	0.927191	0.787155	0.942652	-0.581631	-1.11487	-0.958055	-1.03393
Tnnt2	0.723638	1.44874	0.677796	0.665399	-0.343082	-1.08354	-1.07359	-1.01537
Ryr2	0.901706	1.23808	0.927937	0.486474	-0.361122	-1.17135	-0.939469	-1.08226
Fsd2	0.824846	1.06482	0.793054	0.71348	-0.859335	-1.72657	-0.405145	-0.405145
Fhl2	0.826798	1.07042	0.544259	0.870224	-0.233459	-1.26009	-1.55014	-0.268001
Map2	0.815362	1.46999	0.280411	0.846462	-1.00104	-0.264343	-1.11042	-1.03642
Actc1	0.789166	1.22609	1.31753	0.127986	-0.71161	-1.15961	-0.734575	-0.854974
Ckmt2	0.658732	0.980034	0.896126	0.83603	-0.277283	-1.7451	-0.484434	-0.864108
Ttn	0.7841	1.39226	0.722885	0.616123	-0.368578	-1.31572	-0.940318	-0.890755
Fabp3	1.02955	0.996521	0.537481	0.971166	-0.30269	-1.38104	-0.887197	-0.963794
Gm45552	0.890972	1.24528	0.884373	0.390204	-0.780883	-0.144824	-1.27725	-1.20787
Aldh1l1	0.447321	1.25043	-0.0632972	1.56245	-0.542609	-1.08581	-0.993536	-0.574948
Gm11799	1.11059	0.63429	1.11059	0.759643	-0.5145	-1.20467	-1.09033	-0.805618
Tpm2	0.778314	1.74623	0.579923	0.170543	-0.82898	-1.22189	-0.770258	-0.453873
Casq2	0.727808	1.50231	0.370777	0.760324	-0.43857	-0.624467	-0.7785	-1.51968
Dsp	0.64728	1.49876	0.466257	0.800024	-0.487302	-1.46286	-0.855494	-0.606665
Gucy1a1	1.01255	1.47184	0.618777	0.212411	-0.385099	-1.42582	-0.569064	-0.935591
Myl3	0.91641	1.41155	0.52467	0.532091	-0.368081	-1.35564	-0.472306	-1.18869
Srl	0.709512	0.830691	0.933265	1.07023	-0.581123	-1.58017	-0.691201	-0.691201
Cd247	0.752414	0.585569	0.622679	1.36208	-0.144518	-1.35945	-1.31252	-0.506259
Rnd3	0.815594	1.38508	0.557244	0.643337	-0.427286	-1.18852	-0.391273	-1.39417
