# Supplementary material for: Cardiovascular disease risk factors induce mesenchymal features and senescence in mouse cardiac endothelial cells
Source: eLife. 2021 Mar 4;10:e62678. doi: 10.7554/eLife.62678 (PMC8043751; doi:10.7554/eLife.62678)
Supplement: Figure 3—figure supplement 1—source data 1. [file elife-62678-fig3-figsupp1-data1.xlsx]

## Sheet: Figure S6A
Z score of differentially expressed inflammatory genes in the cardiac EC of Sedentary and Exercise mice
Gene	Sed 1	Sed 2	Sed 3	Exe 1	Exe 2	Exe 3
Cx3cl1	0.462818	0.76391	1.05607	-1.17558	-1.29253	0.185307
Ldlr	0.444213	1.63083	0.188249	-0.612591	-0.395253	-1.25545
Relb	0.363233	0.871917	1.01903	-0.398538	-1.69882	-0.156826
Zfp36	0.208774	1.13236	1.1884	-0.855686	-0.583162	-1.09069
Bcl3	0.493006	1.14436	1.0072	-0.664563	-1.11466	-0.865346
Prex1	0.364711	0.516601	1.43837	-0.579177	-1.45381	-0.286699
Irf7	0.431336	0.361119	1.31267	0.220626	-1.48474	-0.84101

## Sheet: Figure S6B
Z score of differentially expressed inflammatory genes in the cardiac EC of Chow and HFD fed mice
Gene	CHOW 1	CHOW 2	CHOW 3	HFD 1	HFD 2	HFD 3
Hspd1	0.238115	-0.406584	-0.867107	1.56071	-1.11474	0.589605
Pbk	-0.624033	-1.4742	0.0497094	0.924912	-0.126716	1.25033
Tlr4	-0.157165	-1.00356	-0.829914	1.57428	-0.38947	0.805835
Nfil3	-0.674358	-0.781892	-0.221264	1.90713	0.217919	-0.447536
Irf8	0.431592	-0.881261	-0.881261	1.24206	-0.881261	0.970129
Calr	0.100804	-0.672301	0.437543	0.38708	-1.56957	1.31644
Prdx1	-0.222137	-0.918631	-0.0271442	1.49674	-1.11619	0.787361
Ankrd1	0.165017	-0.374392	-1.48151	1.11457	-0.495872	1.07219
Ifi44	-0.980931	-1.26294	0.615953	0.798815	-0.320814	1.14992
Ace	0.770366	0.664597	0.679987	-0.702081	-1.70929	0.296423
Il20rb	0.460031	0.726096	1.17038	-1.00658	-1.37031	0.0203793
Csf1	0.830764	0.601451	0.808998	-0.828473	-1.6034	0.190661
Themis2	0.433109	0.932628	0.839295	-0.797885	-1.60122	0.194078
Ldlr	0.195038	0.779867	1.31959	-0.518876	-1.50701	-0.268613

## Sheet: Figure S6C
Z score of differentially expressed inflammatory genes in the cardiac EC of Young and Aged mice
Gene	Young 1	Young 2	Young 3	Young 4	Aged 1	Aged 2	Aged 3
Ace	-0.385317	-0.487969	-0.894888	-0.960089	-0.0400128	1.55376	1.21452
Aoc3	-0.577738	-0.383403	-0.599408	-1.03274	-0.132081	0.937181	1.78819
C3	-1.26871	-0.351653	-0.49329	-0.908159	1.09571	0.695544	1.23056
Ccl21a	-1.26302	0.379975	-0.448475	-1.18604	0.831021	0.323777	1.36277
Ccn3	-0.909076	-0.947011	-0.485404	-0.515568	0.233881	0.937364	1.68581
Fgfr1	-0.444503	-0.906138	-0.576273	-0.707615	-0.113862	1.79771	0.950682
Foxf1	-0.501616	-0.139105	-0.79931	-1.10452	-0.220099	1.37673	1.38792
Gprc5b	-0.582413	-0.761587	-0.68949	-0.442085	-0.406462	1.22693	1.6551
Hif1a	-0.489271	-0.476246	-0.893338	-0.356839	-0.637051	1.168	1.68474
Hyal1	-1.12302	-1.20084	0.127848	-0.435125	0.238791	1.48983	0.902517
Hyal2	-0.911642	-0.75207	-0.299784	-0.737892	-0.101259	1.27627	1.52637
Il4ra	-0.492458	-0.450695	-0.864868	-0.544224	-0.466679	1.00994	1.80898
Il33	-0.499702	-0.717543	-1.38618	-0.340156	0.583666	1.37095	0.988967
Serpina1b	-0.510793	-0.726334	-1.05356	-0.869278	0.945655	1.11082	1.1035
Serpine1	-0.418818	-0.17786	-1.1149	-0.905777	-0.076589	1.56491	1.12903
Sgms1	-0.950207	-0.796932	-0.050296	-0.5767	-0.403505	1.61951	1.15813
Slamf1	-0.501865	-1.31781	0.207798	-0.553106	-0.453932	1.19327	1.42564
Irak3	-0.340664	-0.574774	-0.993666	-0.691573	-0.00139589	0.708354	1.89372
Socs5	-0.28671	-0.946508	-0.435163	-0.246076	-0.822507	1.78681	0.950152
Stat3	-0.44913	-0.392296	-0.640563	-0.446599	-0.939391	1.29344	1.57454
Il17rd	-0.275817	-0.83903	-0.488195	-0.681167	-0.519122	1.80092	1.0024
Tlr4	-0.628227	-0.846946	-0.995802	0.158782	-0.395159	1.51203	1.19533
Trpv4	-0.712135	-0.829954	-0.989151	-0.378231	0.323681	0.950377	1.63541
Ednra	1.08639	0.432866	0.332984	0.646281	-1.9941	-0.261577	-0.242841
Ets1	0.618209	0.229043	0.159236	1.39612	-1.19328	0.242598	-1.45192
Il16	0.581132	-0.146604	1.03339	1.35782	-1.12463	-0.75693	-0.944178
Ldlr	1.36663	0.032117	-0.227839	0.537661	-1.93551	0.0177176	0.209221

## Sheet: Figure S6D
Z score of differentially expressed inflammatory genes in the cardiac EC of Sham and TAC (2WKS)
Gene	Sham 1	Sham 2	Sham 3	Sham 4	TAC (2 WKS) 1	TAC (2 WKS) 2	TAC (2 WKS) 3	TAC (2 WKS) 4
Ace	-0.671441	-0.315346	-0.437084	-0.764023	1.4	1.79182	-0.488232	-0.515699
Aoc3	-0.676245	0.368083	-0.337905	-2.04962	0.96238	0.468505	0.903095	0.361706
Ccl21a	-0.75431	0.123228	-0.941462	-1.3995	1.16882	1.32681	-0.168496	0.644908
Cxcl1	-0.513743	-0.397866	-0.414071	-1.22264	0.930942	-0.900656	1.43702	1.08102
Cysltr1	-1.69187	-0.622515	-0.323763	-0.745943	0.529197	1.11131	0.707911	1.03567
Foxf1	-0.854004	-0.737951	0.0524133	-1.6811	0.757156	0.4519	0.786116	1.22547
Gprc5b	-0.550065	-0.0172132	-1.56258	-0.504371	-0.425266	0.953245	0.464304	1.64195
Hif1a	-1.32213	-0.517296	-0.833124	-0.392616	1.14212	1.66159	-0.00459104	0.26604
Hyal2	-1.31037	-0.4052	-0.22669	-1.38861	0.921981	1.19015	0.354483	0.86426
Igf1	-1.51643	-0.381716	-0.9544	-0.578406	1.15142	0.819209	1.08099	0.379339
Il1r1	-0.832948	0.867017	0.0798001	-1.8891	0.271384	0.677228	-0.330155	1.15677
Il1rl2	-0.989701	0.212192	-1.68079	-0.660075	0.646098	1.05535	0.408745	1.00818
Il4ra	-1.07668	0.176436	-0.37963	-1.6176	0.862627	1.06135	-0.106748	1.08024
Lbp	-0.657208	-1.50991	-0.323411	-0.551797	1.04912	1.62914	0.011526	0.352527
Ldlr	-0.352964	-0.762053	-1.28276	-0.212979	1.85295	0.439312	0.839944	-0.521452
Sele	-1.15021	-0.43709	-0.538139	-0.924065	1.69494	1.1914	-0.0542429	0.217407
Selp	-0.506473	-0.634679	-0.718377	-0.856862	1.3162	1.73641	-0.546505	0.210284
Tgfb1	-0.147669	0.415353	-0.255054	-2.14577	0.135813	1.37726	0.190111	0.42995
Tlr4	-0.92466	-0.511266	-0.535535	-1.32654	1.62194	0.460408	0.250385	0.965268
Tnfrsf11a	-1.46948	-0.618027	-0.347047	-1.02445	1.3178	0.817031	0.724893	0.599275
Zbp1	-0.971335	-0.0994848	-0.690768	-1.36646	1.1267	-0.180307	0.989623	1.19203
Apoe	0.901174	1.37061	0.782565	0.385193	-0.336887	-0.645918	-1.22341	-1.23333
Ccrl2	0.752008	1.25165	0.806806	0.679418	-0.383055	-1.51359	-0.952178	-0.64106
Cxcl9	0.801676	0.519105	0.7312	0.925598	-0.920878	-1.94627	-0.220084	0.109657
Il16	0.691224	1.39692	0.864867	0.379895	-1.54611	-0.981813	-0.409376	-0.395612
Pparg	0.735617	1.04374	0.877843	0.57135	-0.325774	-0.541558	-1.91727	-0.443952

## Sheet: Figure S6E
Z score of differentially expressed inflammatory genes in the cardiac EC of Sham and TAC (7WKS)
Gene	Sham 1	Sham 2	Sham 3	Sham 4	TAC (7 WKS) 1	TAC (7 WKS) 2	TAC (7 WKS) 3	TAC (7 WKS) 4
Ackr2	-0.862888	-1.094	-0.152112	-1.3337	0.476147	1.15276	0.739257	1.07454
Chst2	-0.164142	-1.34955	-0.326121	-0.844385	0.230055	0.807985	-0.242701	1.88885
Ctla2a	-1.6769	-0.570824	-0.612267	-0.166079	0.646093	0.689325	0.0910132	1.59964
Cysltr1	-1.49209	-0.639015	-0.400685	-0.73748	0.549123	0.911492	0.236153	1.5725
Ecm1	-0.627843	0.0960683	-1.04308	-1.238	0.250501	0.137216	0.522028	1.90311
Ednrb	-0.790209	-0.66795	-0.817658	-1.09431	0.0387482	1.43576	0.628632	1.26699
Epha2	-0.219327	-0.115398	-0.937775	-0.768552	-0.542611	1.36949	-0.524604	1.73878
Foxf1	-0.868603	-0.754044	0.026147	-1.68505	0.595016	0.817403	0.750406	1.11873
Igf1	-1.66271	0.0132065	-0.832619	-0.277294	1.06636	1.49056	-0.105734	0.308235
Il4ra	-0.750391	-0.265835	-0.480855	-0.959554	-0.240622	0.843275	-0.240622	2.0946
Il6	-1.03083	-1.47036	-0.334197	-0.449808	0.727279	0.287751	0.765721	1.50444
Nfkbia	0.049471	-0.470724	-0.86799	-0.876126	0.390131	0.0869187	-0.510462	2.19878
Ptgs1	-1.23229	-0.871797	-0.440789	0.233193	1.02736	1.05653	-0.952664	1.18045
Relb	-0.579443	0.354563	-0.4407	-1.99187	0.742894	0.661382	1.17532	0.0778606
Sele	-1.22436	-0.0889821	-0.249864	-0.864306	0.720472	-0.614822	0.422368	1.8995
Sema7a	-0.49944	-0.56348	-0.719563	-0.705422	-0.661845	1.14257	0.0926095	1.91457
Socs5	-0.478686	0.359356	-0.498005	-1.21445	-0.436474	1.91626	-0.52909	0.881091
Stat3	-0.565748	0.409656	-0.354926	-0.941164	-0.708079	1.27105	-0.777698	1.66691
Tnfaip2	-0.83284	-0.437235	-0.319271	-0.859327	-0.568556	1.35557	-0.10015	1.76181
Tgfb1	-0.230302	0.306279	-0.332644	-2.13457	0.219454	0.416858	1.33807	0.416858
Zbp1	-0.96842	0.0686956	-0.63467	-1.43844	1.1898	0.65456	-0.178973	1.30745
Apoe	0.916541	1.37404	0.800949	0.413681	-0.453377	-1.22749	-0.708565	-1.11578
Cxcl9	0.804115	0.583637	0.749125	0.900806	0.211787	-0.309457	-1.17196	-1.76806
Hspd1	1.34753	1.1926	0.459348	-0.0291497	-0.62644	-0.0175245	-1.63819	-0.688178
Il16	0.710384	1.27672	0.849735	0.460538	-0.228873	-0.32131	-1.40561	-1.34158
S1pr3	0.605927	1.41413	0.861823	0.139294	-0.391063	-0.465343	-0.321344	-1.84342
Tspan2	-0.214302	1.27844	1.25231	0.798297	-0.991062	-0.0671672	-0.948354	-1.10816
