# Supplementary material for: Cardiovascular disease risk factors induce mesenchymal features and senescence in mouse cardiac endothelial cells
Source: eLife. 2021 Mar 4;10:e62678. doi: 10.7554/eLife.62678 (PMC8043751; doi:10.7554/eLife.62678)
Supplement: Figure 3—figure supplement 2—source data 1. [file elife-62678-fig3-figsupp2-data1.xlsx]

## Sheet: Figure S7B
Quantification of SA-β-gal+ cells in the heart of Chow and HFD mice
	SA-β-gal+ cells/field
	CHOW	HFD
	19.8571	88.4
	29.875	133.8
	19.5	58
	14.125	144.778
Mean	20.8393	106.244

## Sheet: Figure S7C
Z score of differentially expressed SASP genes in the cardiac EC of Chow and HFD fed mice
Gene	CHOW 1	CHOW 2	CHOW 3	HFD 1	HFD 2	HFD 3
Actc1	-0.501749	-0.209853	-1.27144	0.984476	-0.400683	1.39925
Calr	0.100804	-0.672301	0.437543	0.38708	-1.56957	1.31644
Cct4	-0.0268942	-0.681773	-0.365402	1.53433	-1.21523	0.754974
Cct5	0.373748	-0.536969	-0.699714	1.47271	-1.23429	0.624513
Cct6a	0.112257	-0.553647	-0.539193	1.66156	-1.1764	0.49543
Cct7	0.113069	-0.630786	-0.394229	1.64868	-1.21818	0.481451
Cycs	-1.09104	-0.59548	-0.347108	1.17674	-0.461136	1.31802
Esd	-0.041998	-0.690923	0.0655972	1.17798	-1.47977	0.969118
Hspb1	0.49868	-0.677947	-1.13324	1.34882	-0.788703	0.752395
Hspd1	0.238115	-0.406584	-0.867107	1.56071	-1.11474	0.589605
Hspe1	-0.254014	0.0736173	-1.49297	1.57112	-0.286114	0.388362
P4ha1	0.556205	-1.03037	-1.25795	1.15156	-0.235036	0.815595
Ppp1cb	-0.0531861	-0.7383	-0.362407	1.61838	-1.12491	0.660427
Prdx1	-0.222137	-0.918631	-0.0271442	1.49674	-1.11619	0.787361
Ptges3	0.202271	-0.853227	-0.71396	1.74397	-0.740921	0.361864
Rps12	-0.402691	-0.456368	-0.0930375	1.95513	-0.885809	-0.117221
Rps14	-0.190206	-0.633254	-0.872178	1.56832	0.880474	-0.753159
Serpinh1	0.84606	-0.990538	-1.28518	0.717157	-0.308272	1.02077
Tcp1	0.201126	-0.949222	-0.299175	1.1202	-1.20083	1.1279
Tuba1a	0.0549681	-1.08044	-0.674558	1.8244	-0.200822	0.0764524
Tubb4b	-0.71408	-0.905947	-0.0816402	1.87634	0.164438	-0.33911
Vwa1	-0.149301	-0.597464	-0.152598	1.29189	-1.3903	0.997767
Igfbp3	1.00436	0.551003	0.748823	-0.915469	-1.50817	0.119449

## Sheet: Figure S7D
Z score of differentially expressed SASP genes in the cardiac EC of Sham and TAC (2WKS)
Gene	Sham 1	Sham 2	Sham 3	Sham 4	TAC (2 WKS) 1	TAC (2 WKS) 2	TAC (2 WKS) 3	TAC (2 WKS) 4
Anxa2	-0.127755	0.0494678	0.0583344	-1.85665	1.47791	0.977635	0.0445339	-0.623476
Atp1a1	-0.402428	1.0781	-0.474805	-1.87053	1.20711	0.481794	-0.371572	0.352322
Col4a1	-0.631201	-0.417982	-1.23613	-1.21238	0.374225	0.991502	0.937024	1.19494
Copa	-0.0344563	1.33115	-1.24109	-1.4529	0.812012	0.42602	-0.521243	0.680504
Gnai2	0.264933	1.69838	-1.46514	-1.17833	0.603474	-0.140761	-0.11774	0.335188
Hspg2	-0.947383	0.272546	-1.34924	-0.84853	1.3062	1.1888	-0.196577	0.574188
Igfbp4	-0.468747	0.0978815	-1.23398	-0.866666	1.66391	1.12771	-0.610215	0.290106
Igfbp5	-0.855156	-0.142185	-0.884853	-1.22158	1.77321	0.813092	0.128354	0.389117
Igfbp7	-0.820793	-0.61189	-1.0005	-1.07738	0.153258	1.06374	1.09743	1.19614
Iqgap1	-0.571653	1.21836	-0.766808	-1.24005	0.975787	1.09662	0.216027	-0.928284
Itga5	-0.43202	-0.448348	-0.774832	-1.61334	0.897144	0.448913	1.48791	0.434568
Lamb1	-0.978719	-0.14195	-0.631598	-1.61917	0.960253	1.11003	0.667401	0.63376
Lamc1	-1.07096	-0.333226	-1.22654	-0.953281	0.635781	1.08109	0.853696	1.01345
Lgals3bp	-0.419311	0.559553	-2.11844	-0.321063	1.06823	0.371659	0.0611247	0.798251
Pdlim1	-0.720674	-0.255904	-0.87919	-1.32949	1.39005	0.391061	0.0681883	1.33596
Pfkp	-0.286021	0.287413	-0.0580246	-2.30368	0.412042	0.638462	0.442687	0.86712
Plec	-0.824807	-0.614005	-0.240818	-1.64469	1.3624	0.715894	0.754879	0.491147
Ppic	-1.25135	-0.00857489	-1.68279	0.0297911	0.220974	0.799166	0.698839	1.19395
Pxdn	-1.5663	0.822285	-1.3697	0.452733	0.825207	0.544642	-0.474733	0.765862
Timp2	-1.23487	0.0614257	-0.320861	-0.670578	1.60363	1.40833	-0.473066	-0.374009
Vim	-1.22069	-0.706941	-0.554257	-0.735911	1.83645	0.721327	0.170773	0.489242
Vwa1	0.0660851	0.0124176	-0.138706	-2.20237	1.34696	0.246865	0.450501	0.218246
Anp32a	0.365339	1.85365	0.620085	0.252316	-0.327704	-1.31863	-0.507983	-0.937071
Ech1	0.572571	1.59071	0.54681	0.668965	-0.322246	-1.22903	-1.14899	-0.678786
Eps8l2	0.830052	0.902938	0.434657	1.06679	-0.778905	-0.453756	-0.178519	-1.82326
Mylk	0.839114	1.75212	0.647117	0.0239636	-0.934997	-1.03338	-0.764049	-0.529887

## Sheet: Figure S7E
Z score of differentially expressed SASP genes in the cardiac EC of Sham and TAC (7WKS)
Gene	Sham 1	Sham 2	Sham 3	Sham 4	TAC (7 WKS) 1	TAC (7 WKS) 2	TAC (7 WKS) 3	TAC (7 WKS) 4
Actn1	-0.337264	-0.108143	-0.469598	-0.745622	-0.355863	1.12821	-1.02284	1.91112
Capg	-1.0209	0.0327613	-1.44957	-0.451798	0.195447	0.891693	0.128604	1.67376
Clu	-0.599142	-0.445413	-0.899617	-0.675234	0.0976646	0.0767586	0.180142	2.26484
Col4a1	0.11946	0.675264	-1.45742	-1.3955	1.32021	0.720469	-0.304345	0.321867
Col4a2	-0.546316	0.752514	-1.60465	-0.644168	1.60771	0.377875	-0.427702	0.484737
Trp53i11	-0.248658	0.377557	-0.729442	-1.44044	-0.417956	1.26394	-0.325113	1.52011
Igfbp5	-0.755416	0.553695	-0.809942	-1.42822	-0.441016	1.31462	0.410555	1.15572
Igfbp7	-0.539718	-0.385162	-0.672672	-0.729556	0.575925	0.376925	-0.754668	2.12893
Lamb1	-0.92415	0.161852	-0.473638	-1.75537	0.133077	0.731998	1.07195	1.05428
Lamc1	-0.674672	0.879342	-1.00239	-0.426778	0.195083	1.30704	-1.32196	1.04434
Lmna	-0.838473	0.37078	-0.374745	-1.32268	-0.662889	1.0714	0.123506	1.63309
Mmp14	-0.970847	-0.458288	-0.953392	-0.730573	0.471671	0.730096	0.00104101	1.91029
Pdlim1	-0.55708	-0.312205	-0.640597	-0.87785	-0.539181	1.70346	-0.245681	1.46913
Sema7a	-0.49944	-0.56348	-0.719563	-0.705422	-0.661845	1.14257	0.0926095	1.91457
Srsf2	0.00397656	0.211463	-1.5856	-1.23427	0.917398	0.793577	-0.276879	1.17033
Tgfb1	-0.230302	0.306279	-0.332644	-2.13457	0.219454	0.416858	1.33807	0.416858
Tnc	-0.736397	-0.229602	-1.32031	0.0431037	-0.894941	1.52715	0.466992	1.14401
Actc1	0.789166	1.22609	1.31753	0.127986	-0.71161	-1.15961	-0.734575	-0.854974
Cst3	1.07154	1.37122	0.307325	0.362848	-0.0522774	-1.04803	-0.449972	-1.56265
Hspd1	1.34753	1.1926	0.459348	-0.0291497	-0.62644	-0.0175245	-1.63819	-0.688178
Igf2	0.860033	1.27207	0.836952	0.00921923	-0.205802	-0.90785	-0.114801	-1.74982
Mdh1	1.11396	1.42456	0.293998	0.590842	-0.462971	-0.668639	-1.08804	-1.20371
Mylk	0.832537	1.62141	0.666643	0.128215	-1.09614	-0.80456	-1.1534	-0.194707
Pltp	0.855648	1.58581	0.58695	0.412507	-0.44969	-0.84696	-1.1719	-0.972366
