# Supplementary material for: Cardiovascular disease risk factors induce mesenchymal features and senescence in mouse cardiac endothelial cells
Source: eLife. 2021 Mar 4;10:e62678. doi: 10.7554/eLife.62678 (PMC8043751; doi:10.7554/eLife.62678)
Supplement: Figure 3—figure supplement 3—source data 1. [file elife-62678-fig3-figsupp3-data1.xlsx]

## Sheet: Figure S8A
QPCR Validation of Apln in the cardiac EC of the indicated groups and the data presented as Fold change (Ctrl = 1).
Apln	Sed	Exe	Young	Aged	Chow	HFD
	1.01438	0.725678	1.11887	1.28091	1.01968	1.10586
	0.808113	0.484172	0.773747	1.70618	0.997292	2.06054
	0.993903	0.706202	1.26673	1.3406	0.708335	2.49441
	1.2274	0.567683	0.911879	1.41349	1.38828	1.47857
				1.67392		1.48601
						2.35099
Mean	1.01095	0.620934	1.01781	1.48302	1.0284	1.8294

## Sheet: Figure S8B
QPCR Validation of Vash1 in the cardiac EC of the indicated groups and the data presented as Fold change (Ctrl = 1).
Vash1	Sed	Exe	Young	Aged	Chow	HFD
	0.922	0.515	0.823	2.661	1.09	2.919
	1.565	0.18	0.908	0.855	0.856	3.197
	1.088	0.757	1.413	1.131	0.513	2.701
	0.637	0.353	0.947	1.252	2.088	1.756
				0.142		3.195
				1.31		2.828
Mean	1.053	0.45125	1.02275	1.22517	1.13675	2.766

## Sheet: Figure S8C
QPCR Validation of Vim in the cardiac EC of the indicated groups and the data presented as Fold change (Ctrl = 1).
Vim	Sed	Exe	Young	Aged	Chow	HFD
	0.827	1.016	0.969	1.674	1.154	2.289
	0.986	0.325	1.086	1.653	0.828	2.623
	1.46	1.302	1.129	1.563	0.553	2.796
	0.84	0.653	0.842	1.36	1.892	1.278
				1.668		2.332
						2.667
Mean	1.02825	0.824	1.0065	1.5836	1.10675	2.33083

## Sheet: Figure S8D
QPCR Validation of Sparc in the cardiac EC of the indicated groups and the data presented as Fold change (Ctrl = 1).
Sparc	Sed	Exe	Young	Aged	Chow	HFD
	1.016	0.885	0.919	1.238	1.069	3.094
	0.905	0.635	0.902	0.731	0.819	4.126
	1.23	0.82	1.149	1.06	0.797	3.584
	0.884	0.506	1.05	1.239	1.433	1.578
				1.378		2.808
				0.859		1.882
Mean	1.00875	0.7115	1.005	1.08417	1.0295	2.84533

## Sheet: Figure S8E
QPCR Validation of Tgfbr2 in the cardiac EC of the indicated groups and the data presented as Fold change (Ctrl = 1).
Tgfbr2	Sed	Exe	Young	Aged	Chow	HFD
	1.124	0.278	0.589	4.006	1.089	3.827
	0.875	0.428	1.923	2.423	0.762	3.472
	1.31	0.965	0.722	2.214	0.588	3.757
	0.777	0.46	1.222	2.383	2.047	1.831
				1.701		4.579
				1.654		3.192
Mean	1.0215	0.53275	1.114	2.39683	1.1215	3.443

## Sheet: Figure S8F
QPCR Validation of Tgfb1 in the cardiac EC of the indicated groups and the data presented as Fold change (Ctrl = 1).
Tgfb1	Sed	Exe	Young	Aged	Chow	HFD
	0.763	1.18	1.168	1.074	1.127	2.215
	1.074	1.174	1.173	0.938	1.084	2.466
	1.11	1.36	0.851	0.949	0.474	2.75
	1.099	0.829	0.858	1.258	1.726	1.057
				0.908		2.476
				1.075		1.772
Mean	1.0115	1.13575	1.0125	1.03367	1.10275	2.12267
