# Supplementary material for: Cardiovascular disease risk factors induce mesenchymal features and senescence in mouse cardiac endothelial cells
Source: eLife. 2021 Mar 4;10:e62678. doi: 10.7554/eLife.62678 (PMC8043751; doi:10.7554/eLife.62678)
Supplement: Figure 3—source data 2. [file elife-62678-fig3-data2.xlsx]

## Sheet: Figure 3B
Z score of differentially expressed genes associated to EndMT in the cardiac EC of Sedentary and Exercise groups
Gene	Sed 1	Sed 2	Sed 3	Exe 1	Exe 2	Exe 3
Malat1	-1.13108	-1.09144	-0.289051	0.712157	0.49988	1.29954
Mgp	-0.387629	-1.5028	-0.0436413	1.43488	-0.200932	0.700126
Ankrd11	-1.1158	-0.96503	0.334962	1.58653	-0.22176	0.381098
Plcb4	-0.697477	-1.47843	0.0592995	0.900248	1.23029	-0.013922
Rock1	-1.08053	-1.24733	0.604432	1.10072	-0.191542	0.814253
Adgrg6	-0.0284703	-1.67685	-0.606665	0.906937	0.632823	0.772223
Ppp4r3a	-1.39479	-1.02622	0.445696	0.895807	0.082774	0.996731
Phip	-1.19554	-1.12483	0.577818	0.981916	-0.218902	0.979538
Clk1	-0.693785	-1.55922	-0.136488	1.1222	0.576639	0.690655
Ankrd12	-1.03516	-1.2635	0.190422	1.42272	0.478097	0.20743
Ppl	-0.386992	-1.35828	-0.792382	0.978334	1.09947	0.459855
Krit1	-1.02131	-1.21984	-0.0390728	0.954348	0.080854	1.24502
Calcrl	-0.869844	-1.30721	0.67952	1.38341	-0.219077	0.333201
Apln	0.0343034	0.956077	1.30141	-0.11659	-1.01099	-1.16421
Aplnr	0.593973	0.916064	0.677491	-0.0438454	-1.79621	-0.347473
Vash1	0.345734	0.897555	1.14615	-0.191247	-1.49191	-0.706287
Fscn1	0.411963	1.04036	0.991214	-0.166526	-1.40807	-0.868942
Cd93	0.560612	0.668504	1.06199	-0.404466	-1.70742	-0.179214
Vwa1	0.563578	1.04881	0.807972	-0.930154	-1.43576	-0.0544398
Adamts4	0.956371	0.950966	0.494761	-1.53357	-0.756144	-0.112379
Sparc	0.175657	0.564759	1.47339	0.0127808	-1.12594	-1.10065
Col4a2	0.583437	0.765698	1.28142	-1.14133	-0.645276	-0.843953
Cd34	0.0446383	0.602458	1.43041	0.164631	-1.27648	-0.965656
Tuba1a	0.324009	0.99898	1.05195	-0.0208354	-1.27478	-1.07933
Cx3cl1	0.462818	0.76391	1.05607	-1.17558	-1.29253	0.185307
Mest	0.035413	0.664616	1.40448	0.105846	-1.36056	-0.849797
Cnn2	0.31701	0.483327	1.16056	0.157996	-1.78373	-0.33516
Cd44	0.408484	0.877949	0.646021	0.606589	-1.43336	-1.10569
Trp53	0.184137	0.988552	1.17856	-0.159179	-1.38922	-0.80285
Prex1	0.364711	0.516601	1.43837	-0.579177	-1.45381	-0.286699
Hspg2	0.35367	0.711443	1.02119	0.310921	-1.62047	-0.776747
Tnfaip1	-0.0090159	0.332718	1.45694	-0.0739258	-1.66102	-0.0456979
Lamb1	0.0289858	1.06506	0.881631	-0.0901385	-1.74954	-0.135997
Ltbp4	0.35718	0.491791	1.13129	0.38798	-1.62905	-0.739195
Sept4	0.478076	0.753456	1.04904	-0.734426	-1.6003	0.0541528
Unc5b	0.109692	0.628735	1.14563	0.411019	-1.6362	-0.658874

## Sheet: Figure 3C
Z score of differentially expressed genes associated to EndMT in the cardiac EC of Young and Aged groups
Gene	Young 1	Young 2	Young 3	Young 4	Aged 1	Aged 2	Aged 3
Npr3	-0.900438	-1.24295	-0.936629	0.456531	0.468786	1.17078	0.983918
Tagln2	-0.325561	-0.798623	-0.963936	-0.437958	-0.261394	1.69532	1.09215
Vim	-0.650574	-1.11207	-0.326876	-0.533816	0.120959	1.8847	0.617677
Msn	-0.521073	-0.89439	-0.490291	-0.0974488	-0.779358	1.70747	1.07509
Socs5	-0.28671	-0.946508	-0.435163	-0.246076	-0.822507	1.78681	0.950152
Vcam1	-0.490799	-0.518136	-0.972022	-0.595605	-0.0807074	0.756786	1.90048
Notch4	-0.109053	-1.23359	-0.329008	-0.396995	-0.594476	1.71949	0.943633
Stat6	-0.404075	-1.1107	-0.298427	-0.299515	-0.520383	1.90259	0.730515
Adamtsl4	-1.6548	-0.0113048	-0.391767	-0.375945	0.121095	0.783758	1.52897
Jag2	-0.136929	-0.943027	-0.35826	-0.482562	-0.844781	1.69336	1.0722
Cdh13	-0.27121	-1.15533	-0.546705	-0.100869	-0.444582	1.93501	0.583689
Hif1a	-0.489271	-0.476246	-0.893338	-0.356839	-0.63705	1.168	1.68474
Ism1	-0.967785	-0.967785	-0.411188	-0.579363	0.399818	1.63132	0.894986
Tbx3	-1.08893	-0.728834	-0.504967	-0.619335	0.569441	1.68906	0.683569
Tgfa	-0.215621	-1.08835	-0.811238	-0.448314	-0.215621	1.41763	1.36152
Furin	-0.330278	-0.691921	-0.770689	-0.500123	-0.481976	1.88019	0.894797
Eng	-0.271544	-0.630787	-0.910089	-0.770486	-0.146977	1.78846	0.941428
Smad6	-0.656969	-0.761921	-0.805305	-0.647329	0.435105	1.83584	0.60058
Smad7	-0.612182	-0.694936	-0.442453	-0.865809	0.166841	1.98958	0.458961
Sox17	-0.582419	-0.514547	-0.506765	-0.861782	-0.406098	1.66878	1.20283
Tead1	-0.752219	-0.997722	-0.425365	-0.22612	-0.370698	1.72289	1.04924
Tead2	-1.26963	-1.08842	-0.31121	-0.0859298	0.31146	1.31199	1.13173
Klf3	-0.77155	-1.22491	-0.0962455	-0.52145	0.0908372	1.72604	0.797277
Klf4	-0.452441	-0.320382	-0.0691873	-0.943863	-0.781315	1.95117	0.61602
Sulf1	-1.16739	-0.343122	-0.612243	-0.281566	-0.201637	0.742082	1.86387
Wt1	-0.355974	-0.806743	-0.576625	-0.272937	-0.579123	2.04483	0.546571
Ankrd1	0.135231	-1.21357	-0.32775	-0.949273	-0.260246	1.23043	1.38518
Cd247	1.129	0.806211	0.212024	0.76255	-1.56275	-0.450479	-0.896562
Hbegf	1.33638	0.53403	-0.200058	0.861048	-1.66496	-0.430204	-0.436236
Vegfc	0.687149	0.927095	-0.423661	0.901559	-1.83029	0.251032	-0.512888
Nos2	0.859358	0.041945	0.338001	1.03644	-1.88938	0.268821	-0.655183
Nrarp	1.06494	0.305051	0.222521	0.453815	-1.30991	0.7566	-1.49302
Rgs2	0.493664	1.0253	-0.286153	1.01307	-0.902763	0.297939	-1.64107
Cldn5	0.428478	0.840877	-0.356309	0.642439	-1.52818	1.04322	-1.07052
Kit	0.643621	-0.346885	0.436004	1.20629	-1.64016	0.587243	-0.886111
Cd200	0.762292	0.00667241	0.0841705	1.48572	-1.73855	-0.329223	-0.271086
Gja4	1.15984	0.946678	-0.224975	0.855396	-1.23314	-1.15496	-0.348832
Nog	0.292889	1.03263	0.0519504	1.17386	-0.730749	-0.111537	-1.70904
Ets1	0.618209	0.229043	0.159236	1.39612	-1.19328	0.242598	-1.45192
Hes1	0.182631	0.394087	0.599448	0.489463	-1.87164	1.02175	-0.815739

## Sheet: Figure 3D
Z score of differentially expressed genes associated to EndMT in the cardiac EC of CHOW and HFD groups
Gene	CHOW 1	CHOW 2	CHOW 3	HFD 1	HFD 2	HFD 3
Apln	-0.708659	-0.624602	-0.403405	1.84829	-0.566948	0.455319
Vwa1	-0.147581	-0.591965	-0.149784	0.996292	-1.39643	1.28947
Tuba1a	0.0602209	-1.07885	-0.674711	0.0723934	-0.203985	1.82493
Ezh2	-0.516084	-0.608464	-0.0250869	0.759209	-1.16681	1.55723
Fsd2	-0.542364	-0.188518	-0.856054	1.75466	-0.733699	0.565973
Mest	-0.247039	-0.477805	-0.438012	1.84876	-1.00086	0.31496
Angptl4	0.363407	-1.93121	-0.0625084	0.578073	0.174906	0.877329
Me1	-0.14779	-1.27933	-0.599256	1.59428	0.632762	-0.200661
Cldn5	-0.848239	-0.773012	0.00091722	-0.0562112	-0.228119	1.90466
Ankrd1	0.19898	-0.379669	-1.49244	1.1015	-0.49271	1.06434
E2f1	-1.18537	-0.56092	-0.865587	1.2814	0.70976	0.620714
Hey1	0.315412	-1.86653	0.401945	0.809132	-0.350792	0.690837
Fndc5	-0.521343	0.252603	-0.438651	1.44614	-1.39597	0.657219
Dsp	-0.0412949	0.322359	-0.546469	1.44964	-1.53898	0.354739
Trp53inp2	0.465788	-0.0420842	-0.254317	1.38124	-1.67157	0.120945
Cd36	0.102463	-0.827835	0.423129	0.961067	-1.55098	0.892161
Hist4h4	0.579651	-1.40631	-0.960785	0.260625	0.248785	1.27803
Xbp1	0.243355	-0.577089	-0.110726	0.588032	-1.5277	1.38413
Inhbb	0.19577	-0.912222	-1.12053	-0.204407	0.408914	1.63247
Podxl	0.82502	0.779664	0.518786	0.361267	-1.57767	-0.907065
Egr1	0.114533	1.51662	0.650548	-0.167502	-1.07353	-1.04068
L1cam	0.999885	0.567332	0.541447	0.327329	-1.61235	-0.823649
Rarg	0.682203	0.959521	0.67412	-0.0021674	-1.64823	-0.66545
Ace	0.771761	0.662009	0.679098	0.296498	-1.71189	-0.697473
Apoe	0.883464	0.59643	0.765727	0.0833572	-1.69289	-0.636092
Mkl2	0.541367	0.642107	0.867391	0.47301	-1.52034	-1.00354
Tln2	0.93455	0.546884	0.603934	0.41771	-1.53048	-0.972597
Pdgfrb	0.695941	0.549905	0.916563	0.339436	-1.50425	-0.99759
Igfbp3	1.00436	0.551003	0.748823	0.119449	-1.50817	-0.915469

## Sheet: Figure 3E
Z score of differentially expressed genes associated to EndMT in the cardiac EC of SHAM and TAC (2 weeks) groups
Gene	Sham 1	Sham 2	Sham 3	Sham 4	TAC (2 WKS) 1	TAC (2 WKS) 2	TAC (2 WKS) 3	TAC (2 WKS) 4
Spry4	-0.33088	-0.0247542	-0.697165	-1.57121	0.711632	0.0271266	1.85117	0.0340762
Mmp14	-1.0696	-0.687364	-1.05658	-0.890419	0.85332	1.03702	0.792633	1.021
Tnc	-1.01723	-0.623231	-1.47118	-0.411221	1.13657	0.70858	0.693776	0.983943
Fn1	-1.29001	0.142593	-0.850217	-1.21981	1.19161	0.975766	0.223902	0.826172
Vim	-1.22069	-0.706941	-0.554257	-0.735911	1.83645	0.721327	0.170773	0.489242
Emilin1	-1.23277	-0.156409	-0.789811	-1.05983	0.849693	0.562882	0.205173	1.62107
Col4a1	-0.631201	-0.417982	-1.23613	-1.21238	0.374225	0.991502	0.937024	1.19494
Tgfb1	-0.147669	0.415353	-0.255053	-2.14577	0.135813	1.37726	0.190111	0.42995
Tgfbr2	-1.20013	0.853153	-1.00864	-1.21568	0.994364	1.00142	0.587247	-0.0117377
Ltbp3	-0.523041	-0.634023	-0.179956	-1.20516	1.74926	1.08437	-0.675535	0.384088
Bmp2	-0.836763	-0.087797	-0.808831	-1.52986	1.11931	1.27469	0.289822	0.579437
Lamb1	-0.978719	-0.14195	-0.631598	-1.61917	0.960253	1.11003	0.667401	0.63376
Msn	-0.763902	1.39318	-0.468577	-1.66008	0.578085	0.593207	-0.452476	0.780553
Sele	-1.15021	-0.43709	-0.538138	-0.924065	1.69494	1.1914	-0.0542429	0.217407
Acta1	-1.3682	-0.858011	0.141606	-0.984406	0.181891	0.382533	1.46065	1.04394
Tagln2	-0.506923	0.807183	-0.195649	-1.6575	1.73919	-0.392981	-0.126147	0.33283
Hif1a	-1.32213	-0.517296	-0.833124	-0.392616	1.14212	1.66159	-0.004591	0.26604
Adamts4	-1.05782	-0.418961	-0.560575	-1.43209	0.583783	0.579511	1.20067	1.10549
Nrp2	-0.732966	0.637016	-1.12556	-1.28547	-0.202907	0.755411	0.422326	1.53215
Esm1	-1.27603	-0.638165	-0.0901328	-1.00063	0.644632	1.76436	0.65082	-0.0548578
Apln	-0.9334	0.288259	-0.879449	-1.40823	0.558958	1.54299	0.0613787	0.769487
Cd34	-1.38351	-0.402449	-1.24981	-0.257466	0.759858	0.302916	0.851613	1.37885
Vash1	-0.413626	-0.101345	-1.10682	-1.46699	0.0960305	0.483107	1.09704	1.4126
Vwa1	0.0660851	0.0124176	-0.138706	-2.20237	1.34696	0.246865	0.450501	0.218246
Epas1	0.81354	1.41203	0.81073	0.472853	-0.827206	-1.38286	-0.756941	-0.54215
Apoe	0.901174	1.37061	0.782565	0.385193	-0.336887	-0.645918	-1.22341	-1.23333
Angpt2	0.754382	1.49904	1.03085	-0.190859	-0.543591	-0.218135	-1.05807	-1.27362
Id2	0.560376	1.45499	0.710392	0.2073	-0.293059	-1.75042	-0.932561	0.0429804
Id3	0.949286	1.16248	0.654477	0.523888	-0.876171	-1.67348	-0.688307	-0.0521812
Efnb1	0.285257	1.44647	1.06206	0.326526	-0.403688	-1.68338	-0.341679	-0.69157
Igf1r	0.361046	1.82865	0.822841	0.0404997	-0.460357	-1.21623	-0.365303	-1.01114

## Sheet: Figure 3F
Z score of differentially expressed genes associated to EndMT in the cardiac EC of SHAM and TAC (7 weeks) groups
Gene	Sham 1	Sham 2	Sham 3	Sham 4	TAC (7 WKS) 1	TAC (7 WKS) 2	TAC (7 WKS) 3	TAC (7 WKS) 4
Spry4	-0.53005	-0.262764	-0.849863	-1.61302	0.314128	1.30969	0.515569	1.11631
Esm1	-1.31722	-0.663385	-0.101636	-1.03492	0.482894	-0.0123908	1.38544	1.26122
Epha2	-0.219327	-0.115398	-0.937775	-0.768552	-0.542611	1.36949	-0.524604	1.73878
Socs5	-0.478686	0.359356	-0.498005	-1.21445	-0.436474	1.91626	-0.52909	0.881091
Sele	-1.22436	-0.0889821	-0.249864	-0.864306	0.720472	-0.614822	0.422368	1.8995
Acta1	-1.41996	-0.934377	0.0170291	-1.05468	1.04928	0.594593	0.962169	0.785945
Nostrin	-0.807432	-0.191399	-0.570294	-1.2528	-0.477757	1.47088	0.494476	1.33432
Esam	-0.0172917	0.273295	-0.773461	-0.936272	-0.253373	1.07863	-1.1044	1.73287
Cd34	-1.34018	0.0482087	-1.15096	0.253387	0.895068	1.55626	-0.657831	0.39605
Tgfb1	-0.230302	0.306279	-0.332644	-2.13457	0.219454	0.416858	1.33807	0.416858
Tnfaip2	-0.83284	-0.437235	-0.319271	-0.859327	-0.568556	1.35557	-0.100151	1.76181
Lamb1	-0.92415	0.161852	-0.473638	-1.75537	0.133077	0.731998	1.07195	1.05428
Ankrd1	-1.66349	-0.167057	-0.861526	-0.597221	0.580086	0.908956	0.49834	1.30191
Mmp14	-0.970847	-0.458288	-0.953392	-0.730573	0.471671	0.730096	0.00104101	1.91029
Vwf	-0.612248	-0.299851	-0.321023	-1.43977	0.22175	-0.171634	0.662869	1.9599
Col4a1	0.11946	0.675264	-1.45742	-1.3955	1.32021	0.720469	-0.304345	0.321867
Tnc	-0.736397	-0.229602	-1.32031	0.0431037	-0.894941	1.52715	0.466992	1.14401
Col4a2	-0.546316	0.752514	-1.60465	-0.644168	1.60771	0.377875	-0.427702	0.484737
Stat3	-0.565748	0.409656	-0.354926	-0.941164	-0.708079	1.27105	-0.777698	1.66691
Ecm1	-0.627843	0.0960682	-1.04309	-1.238	0.250501	0.137216	0.522028	1.90311
Zeb1	-0.860354	0.736173	-0.543291	-0.888007	-0.442336	1.70944	-0.714501	1.00287
Emilin1	-0.891226	0.231244	-0.429294	-0.710881	0.612509	0.458523	-1.15389	1.88301
Sparc	0.400373	0.716063	-1.03255	-1.27985	0.927038	1.137	-1.17358	0.305502
Dsp	0.64728	1.49876	0.466257	0.800024	-0.487302	-1.46286	-0.855494	-0.606665
Notch3	0.705089	1.65531	0.429339	0.349443	-0.305673	-1.51084	-0.340751	-0.981914
Pdgfrb	0.791783	1.50143	0.268152	0.356841	0.0871488	-1.66738	-0.324972	-1.01301
Epha4	0.785471	1.44799	0.917433	0.00515699	-0.120588	-1.1205	-0.544547	-1.37042
Ddr2	0.711662	1.52096	0.224626	0.760367	-0.577236	-1.64257	-0.605118	-0.392693
Zeb2	0.356485	1.81219	0.694255	0.141473	-0.108518	-1.38984	-0.684625	-0.821425
Apoe	0.916541	1.37404	0.800949	0.413681	-0.453377	-1.22749	-0.708565	-1.11578
Sox7	0.47751	1.3523	0.969857	0.645965	-1.08339	-0.671356	-0.330004	-1.36089
Cxcl9	0.804115	0.583637	0.749125	0.900806	0.211787	-0.309457	-1.17196	-1.76806
