# Supplementary material for: Cardiovascular disease risk factors induce mesenchymal features and senescence in mouse cardiac endothelial cells
Source: eLife. 2021 Mar 4;10:e62678. doi: 10.7554/eLife.62678 (PMC8043751; doi:10.7554/eLife.62678)
Supplement: Figure 4—source data 1. [file elife-62678-fig4-data1.xlsx]

## Sheet: Figure 4B
Log2 fold change expression pattern of overlapping genes (SerpinH1, Vwa1, Mest and Fhl3) in the cardiac EC of Exe vs SED, AGED vs Young and HFD vs CHOW mice.
	Gene	Exe vs Sed	Aged vs Young	HFD vs Chow
	SerpinH1	-0.42	0.36	0.97
	Vwa1	-0.5	0.38	0.95
	Mest	-0.38	-0.71	1.01
	Fhl3	-0.64	-0.61	1.14

## Sheet: Figure 4C
QPCR Validation of SERPINH1 in the cardiac EC of the indicated groups
SerpinH1	SED	EXE		YOUNG	AGED		CHOW	HFD
	1.152	0.561		0.967	1.836		1.026	3.632
	0.926	0.457		1.035	1.552		0.633	3.573
	1.276	0.842		0.862	1.513		1.079	2.141
	0.735	0.711		1.16	1.857		1.426	1.721
Mean	1.02225	0.64275			1.428			1.767
					1.187			1.255
			Mean	1.006	1.56217		1.041	2.34817
Vwa1	SED	EXE		YOUNG	AGED		CHOW	HFD
	0.971	0.393		1.34	2.975		1.513	2.978
	1.305	0.272		0.666	3.194		0.453	5.174
	1.122	0.762		1.504	2.413		0.61	3.702
	0.704	0.651		0.745	1.807		2.392	3.768
Mean	1.0255	0.5195			1.446			2.69
					1.405			0.767
			Mean	1.06375	2.20667		1.242	3.17983

## Sheet: Figure 4H-K
QPCR Validation of SerpinH1, Vwa1, Vim and Tgfbr2 in the cardiac EC of the indicated groups
Figure 4H	Aged_SED	Aged_EXE		Figure 4I	Aged_SED	Aged_EXE		Figure 4J	Aged_SED	Aged_EXE		Figure 4K	Aged_SED	Aged_EXE
SerpinH1	1.272	0.553		Vwa1	1.569	0.47		Vim	1.002	0.795		Tgfbr2	1.398	1.076
	0.848	0.671			0.963	0.533			0.864	0.39			0.821	1.211
	1.114	0.424			0.685	0.622			0.687	0.553			0.806	0.907
	0.832	0.491			0.966	1.408			1.68	0.658			1.08	0.576
		0.472				0.787				0.516				1.517
Mean	1.0165	0.53475		Mean	1.04575	0.764		Mean	1.05825	0.599		Mean	1.02625	1.0574
