# Supplementary material for: Cardiovascular disease risk factors induce mesenchymal features and senescence in mouse cardiac endothelial cells
Source: eLife. 2021 Mar 4;10:e62678. doi: 10.7554/eLife.62678 (PMC8043751; doi:10.7554/eLife.62678)
Supplement: Figure 5—source data 1. [file elife-62678-fig5-data1.xlsx]

## Sheet: Figure 5A
Aspect ratio of the HCAECs transduced with LV-Ctrl and LV-SERPINH1-Myc
	LV-CTRL	LV-SERPINH1-Myc
	1.48971	2.25513
	2.26246	5.67839
	1.61475	2.34954
	1.57194	4.15049
	1.112	2.4791
	1.37705	2.00215
	2.98595	3.79476
	2.29167	2.95489
	2.05827	3.25234
	1.55765	2.18596
	2.38682	2.45813
	1.50266	2.36044
	1.29754	2.80634
	1.70623	1.93492
	1.28448	3.55111
	2.7284	3.90667
	0.732609	3.90351
	1.48016	2.67797
	1.44007	2.88026
	1.32174	3.08197
	1.28523	3.14835
	5.9094	2.6235
	1.21799	2.49196
	1.35052	2.0052
	2.29483	1.36407
	1.77033	5.82486
	2.29874	2.26934
	2.77474	2.70347
	1.81184	1.73333
	1.78571	3.5142
	1.71296	1.02968
	1.60465	2.995
	1.53282	2.6494
	1.54896	7.12376
	2.23867	2.28818
	2.4863	3.07143
	1.21685	2.3908
	1.64811	1.88364
	1.2284	3.73109
	2.2042	2.8642
	1.63869	1.82308
	1.81214	2.87305
	2.31311	3.07645
	2.64478	2.6609
	1.28049	2.60403
	1.46628	3.04626
	1.48421	7.77358
	2.05556	5.96269
	1.89017	1.88942
	1.14023	4.46371
	1.36234	4.35294
	3.00306	2.84687
	1.15758	3.24806
	1.43192	3.39865
	1.98404	2.88798
	1.88418	3.27757
	1.99566	2.82097
	1.62651	2.12297
	3.19748	3.18286
	1.54839	2.83149
	1.23607	3.11628
	1.58124	3.68617
	1.90338	3.01689
	2.33156	1.91729
	0.710645	3.16554
	1.54207	1.24291
	1.40992	2.62693
	2.95641	2.20131
	2.03804	3.75833
	1.36103	3.78509
	2.05251	1.57079
	1.31393	1.19885
	1.66947	2.86581
	1.99715	3.74295
	1.68421	2.39286
	2.63889	3.83951
	2.2067	4.68111
	1.22292	2.06237
	1.12346	3.45963
	2.22245	1.23616
	1.88805	1.97554
	3.19693	1.39147
	1.35614	2.94352
	1.68645	3.94382
	1.87143	6.14762
	1.27915	3.18596
	1.29941	4.671
	1.87675	4.26453
	1	1.80696
	2.30333	2.21206
	1.38566	8.71765
	1.98374	2.61985
	1.18699	2.59077
	1.26329	3.52857
	1.50243	2.65152
	1.4575	3.48501
	1.49891	5.13171
	2.34122	2.60705
	1.08434	3.69955
	1.20276	11.4286
	2.35381	3.88318
	1.22222	4.41146
	1.77654	2.84593
	2.28814	6.10526
	1.69713	2.87621
	1.46094	3.35231
	3.0117	4.91071
	1.12773	5.63223
	1.23349	1.06655
	2.23673	3.26697
	1.4252	1.84659
	1.41618	1.0233
	1.89314	1.64652
	2.15789	2.20128
	1.30123	2.7019
	1.99187	1.59057
	1.20638	1.89426
	1.58475	3.46484
	2.74448	2.59799
	1.66609	2.08777
	1.47992	3.74194
	1.0736	3.41176
	1.39433	2.64331
	1.59361	2.71875
	2.03114	2.31373
	1.35654	2.84615
	1.64407	1.7963
	2.67247	3.26378
	1.44638	1.71886
	1.53012	2
	2.68358	4.57225
	1.61667	2.01103
	2.0102	2.3046
	1.74034	2.57103
	1.43633	2.42442
	1.67	2.73359
	2.20403	2.88563
	1.08008	1.61343
	1.35739	4.95597
	2.03248	2.03498
	2.2495	1.36101
	4.37218	1.37463
	2.97727	2.77037
	3.57455	5.39931
	3.66667	3.36824
	2.94402	1.22938
	1.66199	2.93878
	1.57822	2.38228
	1.05818	1.69652
	1.44475	1.65103
	1.31385	3.28384
	1.90206	1.81921
	2.04204	2.14205
	2.83333	2.22512
	4.56349	2.88089
	2.00481	1.82696
	2.36897	8.71698
	2.51966	3.58824
	3.30638	2.2624
	1.84921	2.16944
	2.97792	1.43351
	3.22093	2.52632
	1.72863	1.18578
	3.19081	1.24595
	1.69542	2.43191
	2.10459	1.25258
	1.71461	2.55282
	1.46555	2.73953
	2.55298	3.31176
	4.90173	1.51678
	1.50129	2.44753
	2.29389	1.23164
	1.3523	2.72356
	1.38674	2.36337
	1.33687	2.50177
	1.86431	4.93651
	2.25977	2.90164
	1.37083	1.9589
Mean	1.89835	2.97977

## Sheet: Figure 5C
QPCR analysis of EndMT genes normalised to HPRT1 in LV-CTRL and LV-SERPINH1-Myc transfected HCAECs and the data presented as Fold Change (CTRL = 1)
EndMT Genes	LV-CTRL 1	LV-CTRL 2	LV-CTRL 3	Mean		LV-SERPINH1-Myc #1	LV-SERPINH1-Myc #2	LV-SERPINH1-Myc #3	Mean
CD31	0.94	1.016	1.047	1.001		0.728	0.626	0.69	0.681333
CDH5	1.028	0.973	1.003	1.00133		0.838	0.656	0.659	0.717667
Tie1	0.927	0.925	1.166	1.006		0.784	0.75	0.688	0.740667
NRARP	0.911	0.897	1.223	1.01033		0.533	0.618	0.383	0.511333
ID1	0.859	1.078	1.079	1.00533		0.593	0.545	0.349	0.495667
CyclinD1	0.934	1.066	1.004	1.00133		1.843	1.555	1.877	1.75833
TAGLN	0.95	1.022	1.03	1.00067		1.859	1.955	0.96	1.59133
aSMA	0.73	1.27	1.078	1.026		3.029	3.264	2.751	3.01467
CD44	0.953	0.944	1.112	1.003		1.498	1.232	1.839	1.523
VIM	1.035	0.906	1.067	1.00267		1.448	1.703	1.194	1.44833
NOTCH3	1.018	1.011	0.972	1.00033		2.155	1.719	2.044	1.97267
ZEB2	1.038	0.981	0.982	1.00033		1.403	1.288	1.219	1.30333
SLUG	0.918	1.09	1.0061	1.0047		1.385	1.425	1.729	1.513
FN1	0.866	1.154	1.01	1.01		1.551	1.369	1.458	1.45933
VCAM1	0.87	1.118	1.028	1.00533		2.517	2.354	1.626	2.16567
ICAM1	0.852	1.061	1.106	1.00633		3.642	3.787	2.724	3.38433

## Sheet: Figure 5D
CDH5/GAPDH in LV-CTRL and LV-SERPINH1-Myc transfected HCAECs
	LV-CTRL	LV-SERPINH1-Myc
	1.11081	1.00391
	1.36023	0.897692
	1.09787	0.786951
Mean	1.18964	0.896183

## Sheet: Figure 5F
QPCR analysis of EndMT gene in HCAECs treated with PBS or hTGFB1 or H2O2 and the data presented as Fold Change (CTRL=1)
EndMT genes	HCAEC + PBS - 1	HCAEC + PBS - 2	HCAEC + PBS - 3	Mean		HCAEC + hTGFB1 - 1	HCAEC + hTGFB1 - 2	HCAEC + hTGFB1 - 3	Mean		HCAEC + H2O2 - 1	HCAEC + H2O2 - 2	HCAEC + H2O2 - 3	Mean
SERPINH1	1.001	0.954	1.048	1.001		1.726	1.734	1.22	1.56		1.343	1.152	1.285	1.26
CDH5	0.87	1.117	1.03	1.00567		0.779	0.718	0.626	0.707667		0.876	1.098	0.845	0.939667
CD31	0.987	1.08	0.938	1.00167		0.779	0.644	0.596	0.673		0.346	1.087	1.213	0.882
TIE1	1.013	0.995	0.992	1		0.664	0.82	0.682	0.722		0.616	0.58	0.649	0.615
TAGLN	1.014	1.05	0.939	1.001		2.369	2.563	2.498	2.47667		3.613	3.112	3.104	3.27633
CD44	1.076	1.644	0.565	1.095		2.073	2.004	1.923	2		2.79	3.155	3.332	3.09233
SLUG	0.98	1.017	1.003	1		2.767	2.626	3.012	2.80167		1.272	1.869	1.488	1.543
ICAM1	0.923	1.055	1.028	1.002		1.191	1.547	1.529	1.42233		1.93	2.497	2.211	2.21267
VCAM1	0.873	1.019	1.124	1.00533		1.445	1.912	2.035	1.79733		1.532	1.661	1.691	1.628

## Sheet: Figure 5G
SA-B-gal+ cells (%) in LV-CTRL and LV-SERPINH1-Myc transfected HCAECs
	LV-CTRL	LV-SERPINH1-Myc
	11.9385	44.2466
	11.0131	42.015
	10.8659	49.244
Mean	11.2725	45.1685

## Sheet: Figure 5H
QPCR analysis of SASP gene in LV-CTRL and LV-SERPINH1-Myc transfected HCAECs and the data presented as Fold Change (CTRL=1)
SASP Genes	LV-CTRL 1	LV-CTRL 2	LV-CTRL 3	Mean		LV-SERPINH1-Myc #1	LV-SERPINH1-Myc #2	LV-SERPINH1-Myc #3	Mean
CDKN1A (p21)	0.930538	1.04118	1.03215	1.00129		2.15461	2.32542	2.25192	2.24398
CDKN2A(p16)	1.15603	1.1089	0.780078	1.015		1.57655	2.28174	1.72537	1.86122
IL6	1.00937	1.10049	0.900258	1.00337		1.67317	1.82922	1.52507	1.67582
IL7	1.18051	0.903513	0.937557	1.00719		4.84257	6.45977	5.16828	5.49021
MMP10	0.947805	0.946647	1.11453	1.003		1.18173	1.28867	1.18808	1.21949
CXCL5	0.925391	1.05179	1.02741	1.00153		3.51311	3.10929	3.10764	3.24335
ANKRD1	0.991594	1.11805	0.902001	1.00388		1.71032	1.6555	1.45807	1.60796
PLAT	1.20341	1.10641	0.751055	1.02029		2.99165	3.77926	3.99709	3.58933
PAI-1	1.0298	1.05046	0.924414	1.00156		1.77635	1.38956	1.58975	1.58522
