# Supplementary material for: Cardiovascular disease risk factors induce mesenchymal features and senescence in mouse cardiac endothelial cells
Source: eLife. 2021 Mar 4;10:e62678. doi: 10.7554/eLife.62678 (PMC8043751; doi:10.7554/eLife.62678)
Supplement: Figure 6—source data 1. [file elife-62678-fig6-data1.xlsx]

## Sheet: Figure 6A
Aspect ratio of the HCAECs transduced with LV-SCR and LV-shSERPINH1 (#1 and #2)
	LV-SCR	LV-shSERPINH1 (#1)	LV-shSERPINH1 (#2)
	1.06	2.025	2.406
	2.033	5.466	4.512
	4.105	3.725	2.149
	1.575	1.643	4.1
	2.297	3.674	1.938
	1.712	1.786	1.753
	2.845	0.698	2.049
	3.886	3.068	1.975
	3.451	1.316	3.746
	2.99	3.003	3.201
	2.817	2.597	2.328
	1.355	1.922	2.195
	2.684	3.04	1.723
	1.605	1.727	2.986
	1.711	2.369	1.213
	2.1	1.432	1.869
	1.777	2.38	6.196
	3.777	1.957	2.821
	1.431	3.296	1.43
	2.038	2.357	0.756
	1.739	2.064	3.37
	2.607	2.146	2.033
	2.128	1.886	2.164
	1.776	1.762	1.645
	1.404	7.528	1.523
	2.354	2.146	1.788
	2.8	2.138	1.354
	4.396	1.356	1.889
	2.199	2.693	2.339
	2.501	2.865	1.533
	2.522	2.46	1.49
	1.191	4.133	1.07
	2.904	1.431	0.976
	2.348	2.015	1.286
	1.46	2.025	1.687
	2.467	4.03	1.067
	1.229	1.879	1.141
	1.953	2.237	1.647
	1.439	3.205	1.81
	1.499	2.76	0.966
	2.189	0.979	2.373
	1.537	1.575	1.487
	1.497	2.392	1.392
	1.777	2.081	1.179
	2	1.694	0.989
	2.002	1.328	1.593
	1.42	2.087	1.263
	2.223	3.663	1.238
	1.657	2.938	2.588
	1.972	1.843	3.176
	2.28	2.123	1.797
	1.776	2.053	5.078
	1.394	2.346	2.837
	1.7	2.678	2.516
	1.548	2.624	2.795
	1.328	1.255	1.973
	2.137	1.188	4.243
	2.559	1.245	1.978
	1.877	1.548	2.545
	3.224	3.209	3.275
	2.265	2.545	3.541
	1.219	1.142	1.679
	3.204	1.349	2.161
	2.548	1.68	1.752
	2.431	2.4	1.157
	2.585	2.231	2.64
	4.563	1.703	1.812
	3.016	1.423	2.507
	1.85	2.212	2.805
	2.681	3.902	0.785
	2.43	2.763	4.79
	3.594	1.037	3.089
	1.814	5.005	1.433
	2.3	2.35	3.151
	1.423	1.388	4.726
	2.916	2	2.433
	2.045	1.905	2.024
	1.842	2.89	1.76
	5.515	3.301	3.642
	2.624	2.563	2.772
	1.487	2.981	2.802
	2.236	1.992	2.255
	2.281	3.623	2.138
	2.967	1.205	1.062
	1.765	3.209	1.62
	2.536	3.104	1.314
	2.333	2.617	1.31
	1.832	1.486	1.68
	2.201	0.822	4.602
	1.536	3.363	2.886
	2.71	2.288	4.787
	1.57	1.959	2.101
	4.323	1.813	1.827
	3.117	1.231	1.637
	2.933	3.438	1.778
	1.514	2.88	3.933
	3.222	2.676	2.975
	1.383	1.747	3.522
	2.324	2.15	2.657
	1.698	1.738	2.529
	1.516	0.719	1.822
	1.825	1.548	2.215
	1.619	2.443	1.203
	1.625	3.873	5.747
	2.109	1.657	1.411
	5.439	3.196	2.844
	1.54	1.642	3.21
	2.484	1.297	2.955
	2.479	4.077	1.488
	3.114	1.803	3.12
	7.793	1.775	2.118
	2.833	1.487	2.604
	1.029	3.813	9.11
	2.407	2.419	1.385
	1.798	2.664	2.203
	1.756	4.708	1.836
	2.014	3.131	3.436
	1.307	1.157	1.664
	1.971	2.173	3.071
	2.243	2.456	1.062
	0.874	5.307	2.785
	3.705	2.255	1.288
	1.272	2.525	1.787
	2.313	2.524	4.884
	2.746	4.074	2.512
	1.93	3.153	3.277
	1.304	2.059	2.11
	2.343	1.55	2.595
	0.867	1.926	1.528
	1.371	1.797	1.497
	2.62	1.388	2.507
	1.276	1.69	1.115
	1.175	1.492	2.032
	1.352	2.827	1.627
	1.801	1.861	1.199
	1.093	1.783	1.588
	2.023	2.647	2.434
	1.651	2.401	1.861
	1.793	2.895	3.558
	2.405	2.124	1.926
	3.266	3.391	2.659
	2.418	2.437	4.041
	2.295	1.512	3.945
	1.779	1.584	2.437
	1.904	4.043	1.796
	3.137	1.6	4.379
	1.713	1.179	2.648
	1.013	2.122	1.554
	2.479	2.069	1.34
	1.654	1.45	3.953
	1.807	4.278	2.843
	1.693	2.825	8.609
	1.453	2.967	2.27
	2.235	2.526	1.91
	1.977	3.626	2.641
	2.178	3.313	2.15
	1.833	2.464	1.889
	1.93	2	2.799
	3	3.033	1.65
	2.053	3.165	1.625
	2.599	5.163	2.041
	2.216	1.909	1.905
	1.347	1.984	1.58
	2.144	2.364	2.565
	2.232	1.91	0.837
	3.203	0.681	1.592
	0.963	2.626	1.92
	3.755	2.495	1.907
	1.777	2.287	2.228
	2.357	1.576	2.357
	1.11	1.679	1.729
	1.275	0.826	1.547
	1.195	1.17	1.492
	0.788	1.962	3.46
	2.459	1.926	1.269
	1.7	2.209	2.367
	1.472	1.833	3.12
	1.114	1.128	1.715
	2.008	2.283	1.219
	1.594	2.122	1.884
	1.725	1.474	2.262
	1.261	1.449	2.601
	1.514	2.149	1.453
	6.538	1.97	1.541
	1.867	2.785	1.59
	1.853	1.378	1.313
	2.049	1.692	1.362
	1.601	1.673	2.103
	1.1	1.855	2.265
	1.377	3.528	2.265
	1.76	1.579	1.439
	2.799	2.427	2.086
	3.155	3.618	0.886
	2.076	3.397	2.127
	1.902	2.011	1.512
	2.991	2.359	2.998
	1.774	4.982	2.161
	2.617	1.377	1.935
	1.617	1.207	1.743
	2.445	1.604	2.169
	1.85	1.374	1.355
	2.231	1.782	2.073
	2.344	7.546	1.318
	2.642	2.206	1.657
	2.561	1.652	3.495
	0.768	1.765	1.46
	1.729	1.829	4.807
	1.314	1.292
	5.318	1.609
		1
		1.197
		1.374
Mean	2.18092	2.32251	2.31389

## Sheet: Figure 6C
Analysis of COL1+ % in LV-SCR and LV-shSERPINH1 (#1, #2, #3 and #4) transfected HCAECs.
	LV-SCR	LV-shSERPINH1 (#1)	LV-shSERPINH1 (#2)	LV-shSERPINH1 (#3)	LV-shSERPINH1 (#4)
	9.29	2.561	0.736	1.57	1.635
	12.278	2.879	0.59	1.38	2.687
	15.299	3.312	0.605	1.509	3.141
	14.043	3.627	0.729	0.944	1.088
	15.758	4.003	1.238	1.365	0.149
	15.366	3.996	1.908	1.624	0.13
	18.115	4.256	1.406	1.379	0.237
	20.168	2.796	1.69	2.02	0.334
	18.662	4.254	1.258	1.583	0.604
	13.471	3.288	1.292	1.888	2.696
	15.457	4.962	0.559	1.3	0.912
	12.648	4.857	0.527	0.866	2.22
	16.972	4.583	1.17	1.613	2.846
		2.203	1.128	1.711	0.682
		3.527	1.439	0.501	0.789
		3.921	1.271	1.589
		4.319	1.555	0.526
		4.724		1.946
		4.674		1.074
				1.214
				1.016
				1.244
				1.601
Mean	15.1944	3.798	1.05446	1.46469	1.43685

## Sheet: Figure 6D
QPCR analysis of SERPINH1 deletion levels (normalised to HPRT1) in LV-SCR and LV-shSERPINH1 (#1, #2, #3 and #4) transfected HCAECs and the data presented as Fold Change (CTRL=1).
	LV-SCR	LV-shSERPINH1 (#1)	LV-shSERPINH1 (#2)	LV-shSERPINH1 (#3)	LV-shSERPINH1 (#4)
	0.912	0.108	0.181	0.052	0.092
	1.051	0.082	0.163	0.05	0.079
	1.043	0.108	0.184	0.072	0.066
Mean	1.002	0.0993333	0.176	0.058	0.079
