# Supplementary material for: Cardiovascular disease risk factors induce mesenchymal features and senescence in mouse cardiac endothelial cells
Source: eLife. 2021 Mar 4;10:e62678. doi: 10.7554/eLife.62678 (PMC8043751; doi:10.7554/eLife.62678)
Supplement: Figure 7—source data 1. [file elife-62678-fig7-data1.xlsx]

## Sheet: Figure 7B
Scratch wound healing Assay (LV-CTRL and LV-SERPINH1-Myc) - Wound closure (%)
Time (hrs)	LV-CTRL 1	LV-CTRL 2	LV-CTRL 3	LV-CTRL 4	LV-CTRL 5	LV-CTRL 6	LV-CTRL 7	LV-CTRL 8	Mean
0	0.23	0.31	0.43	0.5	0.08	0.19	0.41	0.51	0.3325
6	2.96	2.66	3.37	2.58	2.63	2.28	1.47	2.79	2.5925
12	10.1	11.51	11.69	10.19	13.68	11.41	12.49	12.83	11.7375
18	25.02	24.64	23.62	24.47	23.76	24.65	25.69	23.86	24.4637
24	45.79	45.66	45.29	43.3	44.61	44.99	45.14	44.57	44.9187
Time (hrs)	LV-SERPINH1-Myc 1	LV-SERPINH1-Myc 2	LV-SERPINH1-Myc 3	LV-SERPINH1-Myc 4	LV-SERPINH1-Myc 5	LV-SERPINH1-Myc 6	LV-SERPINH1-Myc 7	LV-SERPINH1-Myc 8	Mean
0	0.69	0.13	0.75	0.1	0.33	0.28	0.16	0.59	0.37875
6	7.61	10.95	11.18	10.19	15.83	6.7	7.15	8.27	9.735
12	14.88	24.9	26.72	25.68	24.58	17.13	22.37	22.33	22.3238
18	44.56	45.52	45.63	45.85	45.58	46.57	45.65	43.43	45.3487
24	63.62	62.65	62.28	62.11	62.2	62.87	74.87	61.56	64.02

## Sheet: Figure 7D
Scratch wound healing Assay (LV-CTRL, LV-shSERPINH1- #1 and #2) - Wound closure (%)
Time (hrs)	LV-SCR 1	LV-SCR 2	LV-SCR 3	LV-SCR 4	LV-SCR 5	LV-SCR 6	LV-SCR 7	LV-SCR 8	Mean
0	0.2184	0.1404	0.1248	0.0156	0.1404	0.2496	0.1872	0.1092	0.1482
6	4.8516	4.0404	3.7284	5.3664	3.5568	4.0248	3.6192	3.0108	4.0248
12	14.3676	13.2912	12.0744	12.0276	17.316	14.82	15.8028	13.6968	14.1745
18	35.4276	35.0844	35.3184	34.6476	40.2324	38.9532	38.4072	35.1936	36.6581
24	69.5604	70.1064	69.4044	67.6104	76.128	71.2764	70.2936	68.4996	70.3599
Time (hrs)	LV-shSERPINH1 #1 1	LV-shSERPINH1 #1 2	LV-shSERPINH1 #1 3	LV-shSERPINH1 #1 4	LV-shSERPINH1 #1 5	LV-shSERPINH1 #1 6	LV-shSERPINH1 #1 7	LV-shSERPINH1 #1 8	Mean
0	0.5772	0.6864	0.4992	0.234	0.156	0.1872	0.2496	0.1716	0.34515
6	1.5756	4.5084	2.0592	2.184	2.1684	2.6364	1.9812	2.2152	2.41605
12	7.5816	12.1306	6.7392	7.1604	7.2852	5.7564	7.6284	7.3008	7.69782
18	16.2864	18.8292	16.8012	17.004	16.3644	12.6516	12.8544	11.3256	15.2646
24	35.5992	39.4524	37.6428	41.1528	36.3168	37.0968	37.8924	40.2636	38.1771
Time (hrs)	LV-shSERPINH1 #2 1	LV-shSERPINH1 #2 2	LV-shSERPINH1 #2 3	LV-shSERPINH1 #2 4	LV-shSERPINH1 #2 5	LV-shSERPINH1 #2 6	LV-shSERPINH1 #2 7	LV-shSERPINH1 #2 8	Mean
0	0.3432	0.2496	0.1248	0.0312	0.5148	0.1716	0.0624	0.078	0.19695
6	2.184	1.5756	2.5116	2.6988	3.1668	2.2308	2.7768	3.6504	2.59935
12	5.9124	7.1136	6.0996	6.9732	7.488	8.3928	6.8952	8.97	7.2306
18	14.8824	10.1868	11.2632	9.8904	16.9884	11.6844	17.4564	11.6688	13.0026
24	38.3916	29.406	41.34	41.1996	35.1936	36.0048	42.0888	34.1484	37.2216

## Sheet: Figure 7F
EdU/Hoechst (%) cells in LV-CTRL and LV-SERPINH1-Myc transfected HCAECs
	LV-CTRL	LV-SERPINH1-Myc
	0.429646	0.493468
	0.337526	0.525303
	0.43471	0.522651
Mean	0.400627	0.513808

## Sheet: Figure 7G
EdU/Hoechst (%) cells in LV-SCR and LV-shSERPINH1 (#1, #2, #3 and #4) transfected HCAECs
	LV-SCR	LV-shSERPINH1 #1	LV-shSERPINH1 #2	LV-shSERPINH1 #3	LV-shSERPINH1 #4
	0.3373	0.0363	0.0199	0.0215	0.0081
	0.289	0.0144	0.0119	0.0198	0.0092
	0.3838	0.0052	0.0195	0.0219	0.045
Mean	0.3367	0.0186333	0.0171	0.0210667	0.0207667
